# Supplementary material for: Simulating the effect of tillage practices with the globalecosystem model LPJmL (version 5.0-tillage)
Source: Copernicus journal article supplement (doi:10.5194/gmd-2018-255), 2018-11-13
Supplement: Supplementary file [file gmd-2018-255-RC2-supplement.pdf]

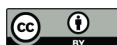

# 1 Simulating the effect of tillage practices with the global 2 ecosystem model LPJmL (version 5.0-tillage)

3 Femke Lutz<sup>1,2\*</sup> and Tobias Herzfeld<sup>1\*</sup>, Jens Heinke<sup>1</sup>, Susanne Rolinski<sup>1</sup>, Sibyll Schaphoff<sup>1</sup>, Werner von Bloh<sup>1</sup>,  
4 Jetse J. Stoorvogel<sup>2</sup>, Christoph Müller<sup>1</sup>

5  
6 <sup>1</sup>Potsdam Institute for Climate Impact Research (PIK), Member of the Leibniz Association  
7 P.O. Box 60 12 03, D-14412 Potsdam, Germany

8 <sup>2</sup>Soil Geography and Landscape Group, Wageningen University, PO Box 47, 6700 AA Wageningen, The  
9 Netherlands.

10 \*Shared lead authorship

11  
12 Correspondence to: Femke.Lutz@pik-potsdam.de

13  
14 **Abstract.** The effects of tillage on soil properties (e.g. soil carbon and nitrogen), crop productivity, and global  
15 greenhouse gas emissions have been discussed in the last decades. Global ecosystem models are limited in  
16 simulating tillage. Hence, they do not allow for analyzing the effects of tillage and cannot evaluate, for example,  
17 reduced-tillage or no-till as mitigation practices for climate change. In this paper, we describe the  
18 implementation of tillage related practices in the global ecosystem model LPJmL. The model is subsequently  
19 evaluated against reported differences between tillage and no-till management on several soil properties. To this  
20 end, simulation results are compared with published meta-analysis on tillage effects. In general, the model is able  
21 to reproduce observed tillage effects on global, as well as regional patterns of carbon and water fluxes. However,  
22 modelled N-fluxes deviate from the literature and need further study. The addition of the tillage module to  
23 LPJmL 5.0 opens opportunities to assess the impact of agricultural soil management practices under different  
24 scenarios with implications for agricultural productivity, carbon sequestration, greenhouse gas emissions and  
25 other environmental indicators.

## 26 1 Introduction

27 Agricultural fields are tilled for various purposes, including seedbed preparation, incorporation of residues and  
28 fertilizers, water management and weed control. Tillage affects a variety of biophysical processes that affect the  
29 environment, such as greenhouse gas emissions or soil carbon sequestration and can promote various forms of  
30 soil degradation (e.g. wind-, water- and tillage-erosion), leaching and runoff. Reduced-tillage or no-till is being  
31 promoted as a strategy to mitigate greenhouse gas (GHG) emissions in the agricultural sector (Six et al., 2004;  
32 Smith et al., 2008). There is an ongoing long-lasting debate about tillage and no-till effects on soil organic  
33 carbon (SOC) and GHG emissions (Schlüter et al., 2018). In general, reduced- or no-till tends to increase SOC  
34 storage through a reduced decomposition and thereby reducing GHG emissions (Chen et al., 2009; Willekens et  
35 al., 2014). However, several field studies have shown contradictory results (Grandy et al., 2006; van Kessel et  
36 al., 2013; Lugato et al., 2018; Powlson et al., 2014; Zhao et al., 2016). This is not surprising as tillage affects a  
37 complex set of biophysical factors. The effect of reduced-tillage or no-till impacts on SOC storage and GHG  
38 emissions varies depending on climate and soil conditions that influence plant and soil processes driving  
39 decomposition (Díaz-Zorita et al., 2002; Ogle et al., 2005).

40 In order to study the role of tillage for biogeochemical cycles, crop performance and mitigation practices, the  
41 effects of tillage on soil physical properties need to be represented in ecosystem models. Though tillage is



42 already implemented in other ecosystem models in different levels of complexity (Lutz et al., under review;  
43 Maharjan et al., 2018), tillage practices in global ecosystem models are currently underrepresented.

44 This paper describes new routines as implemented into the Lund Potsdam Jena managed Land (LPJmL5)  
45 (von Bloh et al., 2018) that allows for studying different tillage practices. This enables us to quantify the effects  
46 of different tillage practices on biogeochemical cycles, crop performance and assessing questions related to  
47 agricultural mitigation practices.

## 48 2 Tillage effects on soil processes

49 Tillage affects different soil properties and soil processes, which result in a complex system with various  
50 feedbacks on soil water, temperature and carbon (C) and nitrogen (N) related processes (Fig. 1). Some processes  
51 are not taken into account in this initial implementation (e.g. soil compaction and water erosion) to limit model  
52 complexity, despite acknowledging that these processes can be important.

53 The effect of tillage has to be implemented and analyzed in conjunction with residue management as these  
54 management practices are often inter-related. The degree to which properties and processes are affected mainly  
55 depends on the tillage intensity. We here describe few selected processes (identified by numbered elements in  
56 Fig. 1), without distinguishing tillage intensities, even though these can be parametrized in LPJmL.

57 The presence of a residue layer on top of the soil column tends to increase water infiltration [1] by  
58 intercepting part of the rainfall, limiting soil crusting and reducing runoff (Ranaivoson et al., 2017). Moreover, it  
59 tends to lower soil evaporation [2] and to reduce the amplitude of soil temperature [3] (Enrique et al., 1999;  
60 Steinbach and Alvarez, 2006). Incorporating residues into the soil increases the soil organic matter (SOM)  
61 content of the tilled soil layer [4], while the bulk density of the tilled soil layer is decreased [5] (Green et al.,  
62 2003). An increase in SOM will positively affect the porosity and therefore the soil water holding capacity  
63 (WHC) [6] (Minasny and McBratney, 2018). The result of a decrease in bulk density affects the WHC through  
64 the porosity [7]. A change in WHC affects several water related processes. For instance, an increase in WHC  
65 reduces lateral runoff and leaching [8], whereas infiltration can be enhanced as the soil can store more soil  
66 moisture [9], which is beneficial for plant access to water [10]. The soil temperature is strongly related to soil  
67 moisture [11], through the heat capacity of the soil, i.e. a relatively wet soil heats up much slower than a  
68 relatively dry soil (Hillel, 2004). Changes in soil moisture and soil temperature influence several processes,  
69 including the rate of SOM mineralization [12]. The rate of mineralization affects the amount of CO<sub>2</sub> emitted  
70 from soils [13] and the inorganic N content of the soil. Inorganic N can then be taken up by plants [14], be lost as  
71 N<sub>2</sub>O [15], or transformed in other forms of N (not shown). After the soil has been tilled, due to gravitational  
72 forces and precipitation, the soil over time consolidates, which means it slowly returns to its original density  
73 level before it was tilled.

74 [Fig. 1]

## 75 3 Implementation of tillage routines into LPJmL

### 76 3.1 LPJmL model description

77 The tillage implementation described in this paper was introduced into the dynamical global vegetation,  
78 hydrology and crop growth model LPJmL (version 5), which was recently extended by a terrestrial N cycle to

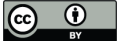

also account for **nutrient limitations** (von Bloh et al., 2018). Previous comprehensive model descriptions and developments can be found in Schaphoff et al. (2018). The LPJmL model simulates the C, N and water cycles and explicit biophysical processes in plants (e.g. photosynthesis) and soil (e.g. mineralization of N and C). The water cycle explicitly considers evaporation, transpiration, soil infiltration and runoff. Soils in LPJmL are represented by five hydrologically active layers, each with a distinct layer thickness. The first soil layer, which is mostly affected by tillage, is 0.2 m deep. The following soil layers are 0.3, 0.5, 1.0 and 1.0 m thick, respectively, followed by a 10.0 m bedrock layer.

In **LPJmL5**, all organic matter pools are represented as C and N pools with **variable C:N ratios** (Appendix – Fig. 5a). The fraction of residues, which are harvested, can range between almost fully harvested (90%, Bondeau et al. 2007) or none, when all residues are left on the field. The C and N content in the residues that are not harvested (>10%) are transferred to the above-ground litter pool (*Litter<sub>ag</sub>*). The C and N content in crop roots are transferred to the below-ground litter pool (*Litter<sub>bg</sub>*). The litter pools are then subject to decomposition, after which the humified products are transferred to one of the *SOM* pools. The *SOM* pools consist of a fast pool with a turnover time of 30 years, and a slow pool with a 1000 year turnover time (Schaphoff et al., 2018). Carbon, water and N pools in vegetation and soils are updated daily as the result of computed processes (photosynthesis, autotrophic respiration, growth, transpiration, evaporation, infiltration, percolation, mineralization, nitrification, leaching and many more; for a full description see Bloh et al. (2018)). LPJmL5 has been evaluated extensively and demonstrated that the model performs credibly for reproducing C-, water and N fluxes in both agricultural and natural vegetation on various scales (Bloh et al., 2018; Schaphoff et al., 2018b).

### 3.2 Litter pools

In order to take care of residue management resulting to tillage, we have introduced an incorporated litter pool (*Litter<sub>inc</sub>*) and a surface litter pool (*Litter<sub>surf</sub>*). Crop residues not collected from the field are transferred to *Litter<sub>surf</sub>*. A fraction of residues from *Litter<sub>surf</sub>* is then partially or fully transferred to the incorporated litter pool (*Litter<sub>inc</sub>*), depending on the tillage practice;

$$Litter_{inc} = Litter_{inc} + Litter_{surf} \cdot TL, \quad (1)$$

and the *Litter<sub>surf</sub>* pool is reduced accordingly;

$$Litter_{surf} = Litter_{surf} \cdot (1 - TL), \quad (2)$$

where *litter<sub>inc</sub>* is the amount of incorporated **surface litter C and N (treated separately but accounting for actual C:N ratios of the pools) in g m<sup>-2</sup> after tillage**. The parameter *TL* is the tillage efficiency, which determines the fraction of residues which are incorporated by tillage (0-1). To account for the vertical displacement of litter through bioturbation under natural vegetation and under no-till conditions, we assume that 0.2% of the *Litter<sub>surf</sub>* is transferred to *Litter<sub>inc</sub>* per day (equivalent to an annual bioturbation rate of 50%).



$Litter_{inc}$  and  $Litter_{surf}$  are subject to decomposition. The decomposition of  $Litter_{inc}$  depends on soil moisture and temperature of the first soil layer, similar to  $Litter_{ag}$  as described in Schaphoff et al. (2018). The decomposition of  $Litter_{surf}$  is described below.

### 3.2.2 Decomposition

The decomposition of litter depends on the temperature and moisture of its surroundings. For the litter pools within the soil column ( $Litter_{bg}$  and  $Litter_{inc}$ ) decomposition depends on soil moisture and soil temperature of the upper soil layer, whereas the decomposition of the  $Litter_{surf}$  depends on its own temperature and moisture, which are approximated by the model (Eq. (5), (12)). As the litter decomposes, a fixed fraction of the C is mineralized, i.e., emitted as  $CO_2$  (70%), whereas the remaining humified C is transferred to the soil C pools following the usual litter and soil decomposition rules as described by von Bloh et al. (2018) and Schaphoff et al. (2018). The mineralized N (also 70%) of the decomposed litter is added to the ammonium pool of the first soil layer, where it is subjected to further transformation (von Bloh et al., 2018), whereas the humified organic N is allocated to the different organic soil N pools in the same shares as the humified C. The decomposition of litter  $decom$  (in  $g\ C\ m^{-2}\ day^{-1}$ ) is described by first-order kinetics (Eq. 3), following Sitch et al. (2003);

$$decom = Litter \cdot (1 - e^{-(k \cdot response)}), \quad (3)$$

where  $k$  is a decomposition rate in  $day^{-1}$  (specific for each “plant functional type”) and  $response$  the litter response function, which depends on the litter temperature ( $T_{litter}$  in  $^{\circ}C$ ) and litter moisture ( $S$  in mm);

$$response = T_{litter} \cdot (0.04021601 - 5.00505434 \cdot (S^3) + 4.26937932 \cdot (S^2) + 0.71890122 \cdot S). \quad (4)$$

$T_{litter}$  is calculated as an average of soil temperature and air temperature.  $S$  depends on the water holding capacity of the litter layer ( $WHC_{litter}$ ), the fraction of residue cover ( $Cover_{surf}$ ) and the amount of water captured by the litter layer ( $Infil_{surf}$ ).

## 3.3 Water fluxes

### 3.3.1 Litter infiltration

Precipitation and applied irrigation water in LPJmL5 is partitioned into interception, transpiration, soil evaporation, soil moisture and runoff (Jägermeyr et al., 2015). To account for the interception and evaporation of water by the surface cover, the water can now also be captured by  $Litter_{surf}$  by infiltration ( $Infil_{surf}$ ) and be lost through litter evaporation. Surplus water that cannot infiltrate into the  $Litter_{surf}$  layer, i.e. more than  $WHC_{litter}$ , infiltrates into the first soil layer. Litter moisture ( $S$ ) is calculated in the following way:

$$S_{(t+1)} = \min(WHC_{litter} - S_{(t)}, Infil_{surf} \cdot Cover_{surf}). \quad (5)$$

$Cover_{surf}$  is calculated by adapting the equation from Gregory (1982) that relates the amount of residues (dry matter) per  $m^2$  to the fraction of soil covered by crop residue;

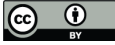

$$Cover_{surf} = 1 - \exp^{-A_m \cdot Litter_{surfOM}}, \quad (6)$$

151

152 where  $Litter_{surfOM}$  is the total mass of dry matter residues in  $g\ m^{-2}$  and  $A_m$  is the area covered per mass of crop  
 153 specific residue ( $m^2\ g^{-1}$ ). The total mass of residues is calculated in the following way:

154

$$Litter_{surfOM} = Litter_{surfC} \cdot CF_{SOM}, \quad (7)$$

156

157 where  $Litter_{surfOM}$  is the total mass of residues in  $g\ SOM\ m^{-2}$ ,  $Litter_{surfC}$  is the amount of C stored in  
 158  $Litter_{surf}$  in  $g\ C\ m^{-2}$ . To get the total amount of SOM in  $Litter_{surfOM}$ , we apply a factor of 2 ( $CF_{SOM}$ ), based on  
 159 the assumption that organic matter is 50% C, as in Pribyl (2010). We apply the average value of 0.004 for  $A_m$   
 160 from Gregory (1982) to all materials, neglecting variations in surface cover for different materials.  $WHC_{litter}$   
 161 (mm) is calculated by multiplying the WHC of a kg of litter (set to  $2 \cdot 10^{-3}\ mm\ kg^{-1}\ SOM$ ) with the litter mass  
 162 ( $Litter_{surfOM}$ ) following Enrique et al. (1999).

### 163 3.3.2 Litter and soil evaporation

164 Evaporation ( $Evap_{litter}$ , in mm) from  $Cover_{surf}$ , is calculated in a similar manner as evaporation from the first  
 165 soil layer where evaporation is a function of potential evapotranspiration (PET), evaporation available water  
 166 ( $\omega_{litter}$ ) relative to  $WHC_{litter}$ , vegetated cover ( $Cover_{veg}$ ) and radiation energy (Schaphoff et al., 2018). Here,  
 167 also  $Cover_{surf}$  is taken into account so that the fraction of soil uncovered is subject to soil evaporation as  
 168 described in Schaphoff et al. (2018);

169

$$\omega_{litter} = S / WHC_{litter}, \quad (8)$$

171

$$Evap_{litter} = PET \cdot \alpha \cdot \max(1 - Cover_{veg}, 0.05) \cdot \omega_{litter}^2 \cdot Cover_{surf}, \quad (9)$$

173

174 where PET is calculated based on the theory of equilibrium evapotranspiration (Jarvis and McNaughton, 1986)  
 175 and  $\alpha$  the empirically derived Priestley-Taylor coefficient ( $\alpha = 1.32$ ) (Priestley and Taylor, 1972).

176 The presence of  $Cover_{surf}$  reduces the evaporation of a soil layer ( $Evap_{soil}$ ).  $Evap_{soil}$  (mm) occurs when there  
 177 is not a full  $Cover_{surf}$  ( $Cover_{surf} < 1$ ).  $Evap_{soil}$  corresponds to the soil evaporation as described in Schaphoff  
 178 et al. (2018), where  $Evap_{soil}$  depends on the available energy for vaporization of water and the available water  
 179 in the upper 0.3 m of the soil ( $\omega_{evap}$ ). However, the fraction of  $Cover_{surf}$  influences evaporation, i.e., a larger  
 180 fraction of  $Cover_{surf}$  results in a decrease in  $Evap_{soil}$ .  $\omega$  is calculated as the evaporation-available water  
 181 relative to the water holding capacity in that layer ( $WHC_{evap}$ );

182

$$\omega = \min\left(1, \frac{\omega_{evap}}{WHC_{evap}}\right), \quad (10)$$

184

185 where  $\omega_{evap}$  is all the water above wilting point of the upper layer (0.2 m) and one third of the second layer  
 186 (0.3 m) (Schaphoff et al., 2018);

187



$$Evap_{soil} = PET \cdot \alpha \cdot \max(1 - cover_{veg}, 0.05) \cdot \omega^2 \cdot (1 - Cover_{surf}). \quad (11)$$

### 3.4 Heat flux

The temperature of the litter layer is calculated as the average of soil temperature of the previous day of the first layer ( $T_{soil, l=1}$  in °C) and air temperature ( $T_{air}$  in °C), in the following way:

$$T_{litter} = 0.5(T_{air} + T_{l=1}). \quad (12)$$

Equation (12) is an approximate solution for the heat exchange described in Schaphoff et al. (2013). In contrast to Schaphoff et al. (2013), the upper boundary condition ( $T_{upper}$  in °C) is no longer equal to  $T_{air}$ , but is now calculated by the  $Cover_{surf}$  weighted average of  $T_{air}$  and  $T_{litter}$ :

$$T_{upper} = T_{air} \cdot (1 - Cover_{surf}) + T_{litter} \cdot Cover_{surf}. \quad (13)$$

### 3.5 Tillage effects on physical properties

#### 3.5.1 Hydraulic properties

Previous versions of the LPJmL model are using static soil hydraulic parameters as inputs, which were calculated using the pedotransfer function (PTF) by Cosby et al. (1984). We now introduced a new approach using the PTF by Saxton and Rawls (2006), which was included in the model in order to dynamically simulate permanent wilting point (PWP), field capacity (FC), saturation (SAT) and saturated hydraulic conductivity (Ks). Owing to the effects of changes in SOM on hydraulic characteristics and on soil productivity, we included a PTF which also takes organic matter content of the soil into account. Though several methods exist to calculate feedbacks of SOM (Pachepsky and van Genuchten, 2011; Wösten et al., 1999) on hydraulic properties, we chose Saxton and Rawls (2006) since -to our knowledge- it was the only PTF where SOM feedbacks on those specific parameters were included. Other PTFs include texture only (Cosby et al., 1984; Rawls et al., 1982; Saxton et al., 1986) or calculate SOM effects on soil water parameters at continuous pressure levels (Van Genuchten, 1980; Vereecken et al., 2010).

Dynamic soil water properties are now calculated on a daily time step via the PTF. The model considers twelve soil textural classes for productive soils, all with a specific percentage of silt, sand (Sa in %v) and clay (Cl in %v) and a 13<sup>th</sup> class for unproductive land, which is referred to as “rock and ice”. The textural classes were derived following the approach by Cosby et al. (1984), who used the midpoint values of each textural class from the USDA textural soil triangle to determine the average percentage of the soil separates sand, silt and clay. These percentages are then used in the PTF to calculate specific soil hydraulic properties for each textural class. PTF following Saxton and Rawls (2006):

$$PWP = 1.14 \cdot \lambda_{pwp} - 0.02, \quad (14)$$

$$FC = 1.238 \cdot (\lambda_{fc})^2 - 0.626 \cdot \lambda_{fc} - 0.015, \quad (15)$$

$$SAT = FC + 1.636 \cdot \lambda_{sat} - 0.097 \cdot Sa - 0.064, \quad (16)$$



$$\lambda_{pwp,fc,sat} = \alpha \cdot Sa + \beta \cdot C + \gamma \cdot SOM + \delta \cdot Sa \cdot SOM + \varepsilon \cdot Cl \cdot SOM + \rho \cdot Sa \cdot Cl + \sigma, \quad (17)$$

$$BD = (1 - SAT) \cdot MD. \quad (18)$$

226

227 [Table 1]

228

229 *SOM* is the soil organic matter content in weight percent (%w), *BD* is the bulk density in kg m<sup>-3</sup>, *MD* is the  
 230 mineral density of 2700 kg m<sup>-3</sup>. *SOM* is calculated using the slow and fast C pool as well as soil bulk density.

231 This way, we ensure a feedback of organic material on soil water properties. *SOM* is calculated as following:

232

$$SOM = \frac{CF_{SOM} \cdot (SC_{fast} + SC_{slow})}{BD \cdot z} \cdot 100, \quad (19)$$

234

235 where *SC<sub>fast</sub>* is the fast decaying C pool in kg m<sup>-2</sup>, *SC<sub>slow</sub>* is the slow decaying C pool in kg m<sup>-2</sup>, *BD* is the bulk  
 236 density in kg m<sup>-3</sup> and *z* is the thickness of the specific soil layer in m. It was suggested by Saxton and Rawls  
 237 (2006) that the PTF should not be used for high *SOM* values, so we only consider *SOM* of up to 5% when  
 238 computing soil hydraulic properties. We treated soils with *SOM* content above this threshold as soils with 5%  
 239 *SOM* content. Saturated hydraulic conductivity is also calculated using the PTF from Saxton and Rawls (2006)  
 240 in the following way:

241

$$Ks = 1930 \cdot (SAT - FC)^{3-\phi}, \quad (20)$$

243

$$\phi = \frac{\ln(FC) - \ln(PWP)}{\ln(1500) - \ln(33)}, \quad (21)$$

245

246 where *Ks* is the saturated hydraulic conductivity in mm h<sup>-1</sup> and  $\phi$  is the slope of the logarithmic tension-moisture  
 247 curve.

### 248 3.5.2 Bulk density

249 Effects of tillage for the tillage layer (first topsoil layer of 0.2 m) are accounted for by adapting *BD* after tillage,  
 250 which is then used to calculate a new *SAT* and *FC*. *Ks* is also newly calculated using *SAT<sub>till</sub>* and *FC<sub>till</sub>* in  
 251 equation (23) and (24). A mixing efficiency (*mE*) depending on the intensity and type of tillage, which can be  
 252 specified as a parameter and ranges between 0 and 1, determines the *BD* after tillage, following the APEX model  
 253 approach (Williams et al., 2015). An *mE* of 0.90 represents a full inversion tillage practice, also known as  
 254 conventional tillage (White et al., 2010). Using *mE* in combination with residue management after harvest, we  
 255 are now able to simulate different tillage types and intensities, depending on the combination of settings. The *BD*  
 256 change after tillage is following Williams et al. (2015):

257

$$f_{BDtill} = 1 - (1 - 0.667) \cdot mE. \quad (22)$$

259

260 Tillage density effects on saturation and field capacity follow Saxton and Rawls (2006):

261

$$SAT_{till} = 1 - (1 - SAT_0) \cdot f_{BDtill}, \quad (23)$$

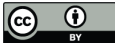

$$FC_{till} = FC_0 - 0.2 \cdot (SAT_0 - SAT_{till}), \quad (24)$$

264

265 where  $f_{BDtill}$  is the density effect on the top soil layer after tillage,  $SAT_{till}$  and  $FC_{till}$  are adjusted saturation and  
 266 field capacity after tillage and  $SAT_0$  is the saturation before tillage.

### 267 3.5.3 Reconsolidation of tillage effect

268 Depending on the structural composition of the soil and the amount of precipitation after the tillage event, with  
 269 time the tilled soil layer reconsolidates to its state before tillage, also known as soil settling. This way the  
 270 porosity and  $BD$  changes caused by tillage gradually decline, caused by a cycle of wetting and drying (Onstad et  
 271 al., 1984). The reconsolidation of the soil is now accounted for using the approach by Williams et al. (2015)  
 272 (Eqs. 25 to 27):

273

$$sz = 0.2 \cdot Infil_{soil} \cdot \frac{1 + 2 \cdot Sa / (Sa + e^{8.597 - 0.075 \cdot Sa})}{z_{till}^{0.06}}, \quad (25)$$

$$f = \frac{sz}{sz + e^{3.92 - 0.0226 \cdot sz}}, \quad (26)$$

$$f_{BDtill(t+1)} = f \cdot (1 - f_{BDtill}), \quad (27)$$

277

278 where  $sz$  is the scaling factor for the tillage layer,  $Infil_{soil}$  is the infiltration rate into the layer in  $\text{mm d}^{-1}$  and  
 279  $z_{till}$  is the depth of the tilled layer in m. This allows for a faster settling of recently tilled soils with high  
 280 precipitation and for soils with a high sand content. In contrast soils with a low sand content settle slower,  
 281 especially in dry areas with low precipitation.

## 282 4 Model setup

### 283 4.1 Model input, initialization and spin-up

284 In order to bring vegetation patterns and  $SOM$  pools into a dynamic equilibrium stage, we make use of a 5000  
 285 years spin-up simulation, which recycles the first 30 years of climate input following the procedures of von Bloh  
 286 et al. (2018). For simulations with land use inputs and to account for agricultural management, a second spin-up  
 287 of 390 years is conducted, to account for historical land use change. The spatial resolution of all input data and  
 288 model simulations is  $0.5^\circ$ . Land use data is based on crop-specific shares of MIRCA2000 (Portmann et al., 2010)  
 289 and cropland and grassland time series since 1700 from HYDE3 (Klein Goldewijk et al., 2010) as described by  
 290 Fader et al. (2010). We drive the model with daily mean temperature from the Climate Research Unit (CRU TS  
 291 version 3.23, University of East Anglia Climate Research Unit, 2015; Harris et al., 2014), monthly precipitation  
 292 data from the Global Precipitation Climatology Centre (GPCC Full Data Reanalysis version 7.0; Becker et al.,  
 293 2013), (shortwave downward and net longwave downward) radiation data from the ERA-Interim data set (Dee et  
 294 al., 2011). Static soil texture classes are taken from the Harmonized World Soil Database (Nachtergaele et al.,  
 295 2009) and soil pH data from the WISE data set (Batjes, 2005). The NOAA/ESRL Mauna Loa station (Tans and  
 296 Keeling, 2015) provides atmospheric  $\text{CO}_2$  concentrations. Deposition of N was taken from the ACCMIP  
 297 database (Lamarque et al., 2013).





## 298 4.2 Simulation options and evaluation set-up

299 The new tillage management implementation allows for specifying tillage systems. We conducted contrasting  
 300 simulations with or without application of tillage. The effect of tillage on current cropland was evaluated. The  
 301 default setting for conventional tillage is:  $mE=0.9$  and  $TL=0.95$ . In the tillage scenario, tillage is conducted twice  
 302 a year, at sowing and after harvest. Soil water properties are updated on a daily basis, enabling the tillage effect  
 303 to be effective from the subsequent day onwards until it wears off. Four different management settings (MS) for  
 304 global simulations were used: 1) tillage performed and residue are left on the field (T\_R), 2) tillage performed  
 305 and residues are removed (T\_NR), 3) no-till and residues retained on the field (NT\_R), and 4) no-till and  
 306 residues are removed (NT\_NR) (Table 2). All of these 4 simulations were run from the year 1900 until 2009.  
 307 Land use was introduced in 1700 and with a spin-up simulation of 390 years for T\_R after the spin-up simulation  
 308 with 5000 years with natural vegetation only. We used fertilizer data supplied by the Global Gridded Crop  
 309 Model Intercomparison (GGCMI phase 1; Elliott et al., 2015). Fertilizers are applied at sowing and when the  
 310 amount of fertilizer is larger than  $5 \text{ g N m}^{-2}$ , 50% is applied at sowing and 50% at a later stage in the growing  
 311 season (depending on the phenological stage of the crop). From 1900 onwards the four new management options  
 312 were introduced on current cropland. The outputs of these four different simulations were analyzed using the  
 313 relative differences between each output variable using T\_R as the default management;

$$315 \quad RD = \frac{MS}{T\_R} - 1, \quad (28)$$

316  
 317 where  $RD$  is the relative difference between the management scenarios. The effects were analyzed using  
 318 different time scales: the average after the first three years for short-term effects, the average after 9 to 11 years  
 319 for mid-term effects and the average of year 19 to 21 for long-term effects. Depending on available reference  
 320 data in the literature, the specific duration of the experiment was chosen. The results of the simulations are  
 321 compared to literature values from selected meta-analyses. Meta-analyses were chosen in order to compare the  
 322 globally modeled results to a set of combined results of individual studies from all around the world, rather than  
 323 choosing individual site-specific studies. Results of individual site-specific experiments can differ substantially  
 324 between sites, which hampers the interpretation at larger scales. We calculated the median and the 5<sup>th</sup> and 95<sup>th</sup>  
 325 percentile (values within brackets) between  $MS$  in order to compare the model results to the meta-analyses,  
 326 where averages and 95% confidence intervals (CI) are mostly reported. We chose medians rather than averages  
 327 to reduce outlier effects. If region-specific values were reported in the meta-analyses, e.g. climate zones, we  
 328 compared model results of these individual regions to the reported regional value ranges.

329 To analyze the effectiveness of individual processes (see Fig. 1) without too many blurring feedback processes,  
 330 we conducted additional simulations of the four different MS on bare soil with uniform dry matter litter input of  
 331  $75 \text{ g m}^{-2}$ ,  $150 \text{ g m}^{-2}$  and  $300 \text{ g m}^{-2}$  of uniform composition (C:N ratio of 20), no atmospheric N deposition and  
 332 static fertilizer input (Elliott et al. 2015). This helps to isolate soil processes, as any feedbacks via vegetation  
 333 performance is eliminated in this setting.

334



335 [Table 2]

## 336 5 Evaluation and discussion

### 337 5.1 Tillage effects on hydraulic properties

338 The calculated soil hydraulic properties of tillage for each of the soil classes prior to and after tillage is  
 339 performed combined with 0% and 5% *SOM* in the tillage layer and a *mE* of 0.9 (table 3). In general, both tillage  
 340 and a higher *SOM* content have an increasing effect on *WHC*, *SAT*, *FC* and *Ks*. Clay soils are an exception,  
 341 since higher *SOM* content decreases their *WHC*, *SAT* and *FC*, and increases *Ks*. For the soil classes sand and  
 342 loamy sand, the increasing effect on *WHC*, *SAT* and *FC* of increasing *SOM* content shows be the highest among  
 343 all classes, while *Ks* decrease with increasing *SOM* content. The increasing effects of tillage on the hydraulic  
 344 properties are generally weaker compared to an increase in *SOM* by 5% (maximum *SOM* content for computing  
 345 soil hydraulic properties in the model). While tillage in sandy soils with a *mE* of 0.9 can increase *WHC* by 7%,  
 346 an increase in 5% of *SOM* can increase *WHC* by 27%.

347 The PTF by Saxton and Rawls (2006) uses an empirical relationship between *SOM*, soil texture and  
 348 hydraulic properties derived from the USDA soil database, implying that the PTF is likely to be more accurate  
 349 within the US than outside. Nevertheless the PTF is used in a variety of global applications despite the  
 350 limitations to validate it at that scale (Van Looy et al., 2017).

351

352 [Table 3]

### 353 5.2. Soil C stocks and fluxes

354 Model outputs for CO<sub>2</sub> emissions from cropland soils, as well as *SOM* and litter C stocks of the topsoil (0.3 m)  
 355 were used to evaluate the effects of tillage and residues management on soil C stocks and fluxes. CO<sub>2</sub> emissions  
 356 and *SOM* response after ten years duration of NT\_R MS compared to T\_R show a discrepancy, as both CO<sub>2</sub>  
 357 emissions and *SOM* stocks increase (Fig. 2A and 2B). The reported numbers refer to the median value across all  
 358 cropland grid cells globally. After a duration of ten years of applied MS, CO<sub>2</sub> emissions from NT\_R compared to  
 359 T\_R are increased by +2.3% (5<sup>th</sup>, 95<sup>th</sup> percentile: -9.6%, +29.0%) (Fig. 2A), while at the same time topsoil and  
 360 litter C is also increased by +5.7% (5<sup>th</sup>, 95<sup>th</sup> percentile: +1.7%, +14%) (Fig. 2B), i.e. the soil C stock has already  
 361 increased enough to sustain higher CO<sub>2</sub> emissions. If we only look at the first three years after the change in MS,  
 362 CO<sub>2</sub> emissions are substantially decreased by -12.2% (5<sup>th</sup>, 95<sup>th</sup> percentile: -18.3%, -2.8%) in a NT\_R system  
 363 compared to T\_R (Fig. 2D). If we only analyze the tillage effect and do not take residues into account, topsoil  
 364 and litter C decreases by -9.9% (5<sup>th</sup>, 95<sup>th</sup> percentile: -27.0%, -0.6%) in a T\_NR system compared to a NT\_NR  
 365 system after ten years (Appendix – Fig. 4A), while CO<sub>2</sub> emissions are increased by +17.1% (5<sup>th</sup>, 95<sup>th</sup> percentile:  
 366 0.0%, +114.4%) (Appendix – Fig. 4B).

367 Abdalla et al. (2016) reviewed the effect of tillage, no-till and residues management and they found that if  
 368 residues are returned, tillage has a decreasing effect on topsoil *SOM* content by 5.0% (95<sup>th</sup> CI: -1.0%, +9.2%)  
 369 and an increasing effect on CO<sub>2</sub> emissions +23% (95<sup>th</sup> CI: -35.0%, -13.8%) (Table 4). These findings of Abdalla  
 370 et al. are in contradiction to our findings for CO<sub>2</sub> emissions after a ten year period, nevertheless if we only take  
 371 the first three years duration of MS into account, CO<sub>2</sub> emissions are decreased as suggested by the literature.



This supports the findings from Abdalla et al. (2016) and highlights the importance of accounting for the duration of the experiment after which the different MS are compared. Abdalla et al. (2016) also reported a decrease in *SOM* (-12%) and an increase in CO<sub>2</sub> emissions (+18%) of a T<sub>NR</sub> system compared to a NT<sub>NR</sub> system. T<sub>NR</sub> was reported to decrease *SOM* content, while at the same time CO<sub>2</sub> emissions are increased, due to a higher soil temperature in a tilled soil and an increased decomposition. The updated LPJmL reproduced these patterns.

A strong CO<sub>2</sub> response can be found in areas where *SOM* increases the most (e.g., northern Mexico and western Australia). This is also true for yields, here shown for maize yields after ten years of NT<sub>R</sub> MS (Fig. 2C), which are mostly increasing in areas with strong *SOM* increase (e.g., Argentina, mid-west USA, northeaster China and south-western Russia). These areas all have a warm temperate dry climate according to the IPCC climate zone classification (Carré et al., 2010). This positive feedback could be driven by a positive water-savings effect from NT<sub>R</sub>, where water which is saved due to NT<sub>R</sub> leads to a higher productivity. NT<sub>R</sub> for example reduces evaporation substantially compared to T<sub>R</sub> and has other positive water-saving feedbacks, which are further discussed in chapter 5.3. In areas with higher productivity, we also have a higher residues input, since litter fall is a function of plant productivity (see Eq. (6)). If productivity feedbacks are disabled, using the simulation from a bare soil experiment, there is no difference in CO<sub>2</sub> emissions between NT<sub>R</sub> and T<sub>R</sub> (Appendix – Fig. 6).

Our simulations of NT<sub>R</sub> and T<sub>R</sub> show that NT<sub>R</sub> has a positive effect on *SOM* (topsoil and litter) and this effect increases over time. Our model is generally reliable to reproduce *SOM* increase under NT<sub>R</sub> for a duration of ten years and increasing CO<sub>2</sub> emissions under T<sub>R</sub> for a duration of three years. Differences to literature estimates occur after ten years under NT<sub>R</sub> with regard to CO<sub>2</sub> emissions because productivity feedbacks under NT<sub>R</sub> are taken into account in our model.

Ogle et al. (2005) conducted a meta-analysis and reported *SOM* changes from NT<sub>R</sub> for different climatic zones. They found a +23%, +17%, +16% and +10% mean increase in *SOM* after converting from a conventional tillage to a no-till system for more than 20 years for tropical moist, tropical dry, temperate moist and temperate dry climates, respectively. Ogle et al. (2005) analyzed the data based on linear mixed-effect models, which do not account for interactions between effects. This could explain why we were not able to reproduce these high numbers in *SOM* increase, since our model results range between a 5.1% to 11.9% increase in *SOM* after 20 years from tropical moist to temperate dry climates, respectively. LPJmL was also not able to reproduce the gradient found by Ogle et al. (2005). There is high discrepancy in the literature in regard to no-till effects on *SOM*, since the high increase found by Ogle et al. (2005) is not supported by the findings of Abdalla et al. (2016). Ranaivoson et al. (2017) found that crop residues left on the field increases *SOM*, which is in agreement with our simulation results.

[Fig. 2]

### 5.3 Water fluxes

Water fluxes are highly affected by tillage and residue management (Fig. 1). Residues, which are left on the soil surface, create a barrier that reduces evaporation from the soil. In addition, a residue cover effectively protects the soil surface from structural degradation through the impact of rain drops, thereby increasing rainfall infiltration. Generally, residues, which are incorporated through tillage, lose the function to protect the soil.



Both, the reduction of soil evaporation and the increase of rainfall infiltration contribute to increased soil moisture and hence plant water availability. Because we could not find suitable approaches to account for the processes leading to increased rainfall infiltration, our implementation only captures the reduction of soil evaporation. However, despite the significant increase in rainfall infiltration and corresponding reduction in surface runoff found in a number of field studies (Ranaivoson et al., 2017), the contribution to plant water availability is likely to be much smaller as a substantial portion of it will be lost through subsurface runoff (lateral runoff and seepage). In cases where the reduction of soil evaporation alone is larger than the increased plant transpiration, the resulting increase in soil moisture may even lead to an overall increase in total runoff (sum of all surface and subsurface runoff components) (Fig. 3A).

Steiner (1989) conducted field and laboratory trials and reported functions for wheat and sorghum to estimate changes in evaporation based on the residue amount. These functions were used to evaluate the evaporative reduction from a layer of residues using the bare soil simulations. We find that an application of  $75 \text{ g C m}^{-2} \text{ yr}^{-1}$  of residues reduces evaporation by -18.2% (5<sup>th</sup>, 95<sup>th</sup> percentile: -34.0%, -2.1%) (Appendix – Fig. 6B),  $150 \text{ g C m}^{-2} \text{ yr}^{-1}$  by -40.3% (5<sup>th</sup>, 95<sup>th</sup> percentile: -55.6%, -9.0%) (Appendix – Fig. 6C) and  $300 \text{ g C m}^{-2} \text{ yr}^{-1}$  by -62.2% (5<sup>th</sup>, 95<sup>th</sup> percentile: -73.4%, -34.4%) (Appendix – Fig. 6D). Using the functions provided by Steiner (1989), residue amounts can be translated into a reduction of evaporation by -36.3% for wheat and -16.5% for sorghum for the low application rates, by -50.2% for wheat and -30.7% for sorghum for the medium application rates and by -64.0% for wheat and by -44.9% for sorghum for the high application rates, respectively (Table 4). These values for evaporation reduction from prescribed residue loads are well reproduced by the model. Overall, soil evaporation in the first 3 years of MS duration in the NT\_R scenario is reduced by -28.4% (5<sup>th</sup>, 95<sup>th</sup> percentile: -49.0%, -11.3%) compared to the T\_R (Fig. 3B).

[Fig. 3]

#### 5.4 N<sub>2</sub>O fluxes

Overall, switching from tillage to no-till management with additional residue input (NT\_R vs. T\_R) increases N<sub>2</sub>O emissions by +7.5% (5<sup>th</sup>, 95<sup>th</sup> percentile: -6.7%, +68.9%) (Appendix – Fig. 7A). The strongest increase is found in the warm temperate zone where the average increase is 11.3% (5<sup>th</sup>, 95<sup>th</sup> percentile: +0.7%, +75.7%) (Appendix – Fig. 7B). The lowest increase is found in the tropical zone +2.9% (5<sup>th</sup>, 95<sup>th</sup> percentile: -8.5%, +43.3%) (Appendix – Fig. 7C).

The increase in N<sub>2</sub>O emissions after switching to no-till is in agreement with several literature studies (Linn and Doran, 1984; Mei et al., 2018; van Kessel et al., 2013; Zhao et al., 2016) (Table 4). Mei et al. (2018) reports an overall increase of +17.3% (95<sup>th</sup> CI: +4.6%, +31.1%), which is higher than our values, but both ranges mostly overlap. However, although the overall effect is in agreement with Mei et al. (2018), the spatial patterns over the different climatic regimes are in less agreement. We strongly underestimate the increase in N<sub>2</sub>O emissions in the tropical zone compared to Mei et al. (2018), who reported an increase of +74.1% (95<sup>th</sup> CI: +34.8%, +119.9%). Moreover, the N<sub>2</sub>O emissions in arid regions after switching to no-till are underestimated (Appendix – Fig. 8B), but still within the range, compared to van Kessel et al. (2013), who reported an increase of +35.0% (95<sup>th</sup> CI: +7.5%, +69%). In the cold temperate (Appendix – Fig. 7D) and humid zones (Appendix – Fig. 8A) we slightly overestimate on average, and the 95<sup>th</sup> percentile of our ranges is relatively high compared to Mei et al. (2018) (average: -1.7% and 95<sup>th</sup> CI: -10.5%, +8.4%) and van Kessel et al. (2013) (average: -1.5% and 95<sup>th</sup> CI: -11.6%,



+11.1%). This is also the case for the warm temperate zone, though the median and average increase is in agreement with Mei et al. (2018), who report an increase of +17% (95<sup>th</sup> CI: +6.5%, +29.9%) (Table 4).

The increase in N<sub>2</sub>O emissions under NT\_R can be explained by two mechanisms. Firstly, under no-till with residues, more water can infiltrate into the soil and less water is lost through evaporation. This can cause anaerobic conditions, which trigger N<sub>2</sub>O emissions from denitrification. Secondly, no-till tends to increase bulk density and moisture content, which results additionally in a larger water-filled pore space (Fig. 1) which can increase the denitrification rate, and therefore N<sub>2</sub>O emissions (van Kessel et al., 2013; Linn and Doran, 1984).

However, the impact of no-till on N<sub>2</sub>O emissions has been variable with both increases and decreases in emissions reported (van Kessel et al., 2013). This variation in response is not surprising, as tillage affects several biophysical factors that influence N<sub>2</sub>O emissions (Fig. 1) in possibly contrasting manners (van Kessel et al., 2013; Snyder et al., 2009). For instance, no-till can lower soil temperature, which can reduce N<sub>2</sub>O emissions (Six et al., 2004). Moreover, under T\_R, more C (from residues) is incorporated into the soil, which leads to more substrate for N<sub>2</sub>O emissions. Reduced N<sub>2</sub>O emissions under no-till compared to the tillage MS can also be observed in the model results, for instance in North-East India, South-East Asia and areas in Brazil (Appendix – Fig. 7A).

Various studies where field experiments are conducted report high uncertainties associated with the estimation of N<sub>2</sub>O emissions, due to significant spatial and temporal variability, which hampers the evaluation of the model results (Chatskikh et al., 2008; Mangalassery et al., 2015). Moreover, the relevant processes behind N<sub>2</sub>O emissions are still not fully understood (Lugato et al., 2018).

The deviations from the model results compared to the meta-analyses especially for specific climatic regimes (i.e. tropical- and cool temperate) cannot be explained other than N<sub>2</sub>O emissions are sensitive to subtle changes in soil moisture, forms of reactive N and timing, which renders all comparisons to patchy data difficult. Additional model evaluation is needed by e.g., conducting sensitivity analysis of specific inputs (e.g., soil type-, N-fertilizer) in different climate regimes for testing the model behavior.

[Table 4]

## 5.5 General discussion

The implementation of tillage into the global ecosystem model LPJmL opens opportunities to assess the effects of tillage and no-till practices on agricultural productivity and its environmental impacts, such as nutrient cycles, water consumption, GHG emissions and C sequestration. The implementation involved 1) the introduction of a surface litter pool, 2) dynamic accounting for SOM in computing hydraulic properties, and 3) tillage effects on physical properties.

In general, a global model implementation on tillage practices is difficult to evaluate, as effects are reported often to be quite variable, depending on soil conditions. We find that the model results for NT\_R compared to T\_R are in agreement with literature for C stocks and fluxes, water fluxes and to a lesser extent N<sub>2</sub>O emissions when compared to reported impact ranges in meta-analyses. Effects can also change over time so that a comparison needs to also consider the timing, history and duration of management changes. For C, e.g., we see that NT\_R has a positive effect on SOM and reduces CO<sub>2</sub> emissions the first years after adapting to NT\_R, but increases CO<sub>2</sub> emissions in the mid- and long-term owing to a larger accumulation of SOM.



In this study, model results were evaluated with data ranges as compiled by meta-analyses, which implies several limitations. Due to the limited amount of available meta-analyses, not all fluxes and stocks could be evaluated within the different management scenarios. Especially for testing residue-only effects, it would have been good to have additional studies to analyze the effects of  $Cover_{surf}$ , which has a strong influence on water-fluxes (e.g., evaporation) and thus affects various other relevant fluxes that are sensitive to soil moisture as well. Also, the sample size was sometimes low, which may result in biases if not all conditions (e.g., climate and soil combinations) were tested, and it remains unclear how these can be best compared to a full sampling of the global cropland as in the modeling results. Nevertheless, the meta-analyses gave the best overview of the overall effects of tillage practices that have been reported for various individual experiments.

When applying the model, it is important to be aware that not all processes related to tillage and no-till are taken into account. For instance, NT\_R can improve soil structure (e.g., aggregates) due to increased faunal activity (Martins et al., 2009), which can result in a decrease in BD. Although tillage has several advantages for farmers (e.g. residue incorporation and topsoil loosening), it can have several disadvantages as well. For instance, tillage can result in compaction of the subsoil, which result in an increase in BD (Podder et al., 2012). Moreover, the absence of a residue layer can drive soil crusting which affects the infiltration of soil water. However, Strudley et al. (2008) observed mixed effects of tillage and no-till on hydraulic properties (such as BD). Nevertheless, they motivate more fruitful investigations into agricultural management practices and their interacting influences on soil hydraulic properties.

One of the primary reasons for tillage, weed control, is not accounted for in LPJmL or most other ecosystem models. As such, different tillage and residue management strategies can only be assessed with respect to their biogeochemical effects, but only partly with respect to their effects on productivity and not with respect to some environmental effects (e.g. pesticide use).

## 6 Conclusion

We described the implementation of tillage related practices in the global ecosystem model LPJmL 5.0-tillage. The extended model was tested under different management scenarios and evaluated by comparing to reported impact ranges from meta-analyses on C, water and N dynamics as well as on crop yields.

We were able to broadly reproduce reported tillage effects on global stocks and fluxes, as well as regional patterns of these changes, with LPJmL 5.0-tillage but deviations in N-fluxes need to be further examined. Not all effects of tillage, including one of its primary reasons, weed control, could be accounted for in this implementation. Nonetheless, the implementation of more detailed tillage-related mechanics into LPJmL improves our ability to represent different agricultural systems and to understand management options for climate change adaptation, agricultural mitigation of GHG emissions and sustainable intensification.

*Code and data availability.* The source code and data is available upon request from the main author for the review process and for selected collaborative projects. The source code will be generally available after final publication of this paper and a DOI for access will be provided.

*Author contributions.* F.L and T.H. both share the lead authorship for this manuscript. They had an equal input in designing and conducting the model implementation, model runs, analysis and writing of the manuscript. S.R.

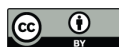

529 contributed to simulation analysis and manuscript preparation/evaluation. J.H. contributed to the code  
530 implementation, evaluation and analysis and edited the paper. S.S. contributed to the code implementation and  
531 evaluation and edited the paper. W.v.B. contributed to the code implementation and evaluation and edited the  
532 paper. J.S. contributed to the study design and edited the paper. C.M. contributed to the study design, supervised  
533 implementation, simulations and analyses and edited the paper.

534

535 *Competing interests.* All authors declare no competing interests.

536

537 *Acknowledgements*

538 F.L., T.H. and S.R. gratefully acknowledge the German Ministry for Education and Research (BMBF) for  
539 funding this work, which is part of the MACMIT project (01LN1317A). J.H. acknowledges BMBF funding  
540 through the SUSTAg project (031B0170A).

541



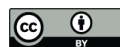

## References

- Abdalla, K., Chivenge, P., Ciais, P. and Chaplot, V.: No-tillage lessens soil CO<sub>2</sub> emissions the most under arid and sandy soil conditions: results from a meta-analysis, *Biogeosciences*, 13, 3619–3633, doi:10.5194/bg-13-3619-2016, 2016.
- Balesdent, J., Chenu, C. and Balabane, M.: Relationship of soil organic matter dynamics to physical protection and tillage, *Soil Tillage Res.*, 53, 215–230, 2000.
- Batjes, N.: ISRIC-WISE global data set of derived soil properties on a 0.5 by 0.5 degree grid (version 3.0), ISRIC – World Soil Information, Wageningen., 2005.
- Becker, A., Finger, P., Meyer-Christoffer, A., Rudolf, B., Schamm, K., Schneider, U. and Ziese, M.: A description of the global land-surface precipitation data products of the Global Precipitation Climatology Centre with sample applications including centennial (trend) analysis from 1901–present, *Earth Syst. Sci. Data*, 5, 71–99, doi:<https://doi.org/10.5194/essd-5-71-2013>, 2013.
- von Bloh, W., Schaphoff, S., Müller, C., Rolinski, S., Waha, K. and Zaehle, S.: Implementing the nitrogen cycle into the dynamic global vegetation, hydrology, and crop growth model LPJmL (version 5.0), *Geosci. Model Dev.*, 11, 2789–2812, doi:<https://doi.org/10.5194/gmd-11-2789-2018>, 2018.
- Carré, F., Hiederer, R., Blujdea, V. and Koeble, R.: Background guide for the calculation of land carbon stocks in the biofuels sustainability scheme: drawing on the 2006 IPCC guidelines for national greenhouse gas inventories, Luxembourg: Office for Official Publications of the European Communities., 2010.
- Chatskikh, D., Olesen, J. E., Hansen, E. M., Elsgaard, L. and Petersen, B. M.: Effects of reduced tillage on net greenhouse gas fluxes from loamy sand soil under winter crops in Denmark, *Agric. Ecosyst. Environ.*, 128, 117–126, doi:10.1016/j.agee.2008.05.010, 2008.
- Chen, H., Hou, R., Gong, Y., Li, H., Fan, M. and Kuzyakov, Y.: Effects of 11 years of conservation tillage on soil organic matter fractions in wheat monoculture in Loess Plateau of China, *Soil Tillage Res.*, 106, 85–94, doi:10.1016/j.still.2009.09.009, 2009.
- Cosby, B. J., Hornberger, G. M., Clapp, R. B. and Ginn, T. R.: A Statistical Exploration of the Relationships of Soil Moisture Characteristics to the Physical Properties of Soils, *Water Resour. Res.*, 20, 682–690, doi:10.1029/WR020i006p00682, 1984.
- Dee, D. P., Uppala, S. M., Simmons, A. J., Berrisford, P., Poli, P., Kobayashi, S., Andrae, U., Balmaseda, M. A., Balsamo, G., Bauer, P., Bechtold, P., Beljaars, A. C. M., Berg, L. van de, Bidlot, J., Bormann, N., Delsol, C., Dragani, R., Fuentes, M., Geer, A. J., Haimberger, L., Healy, S. B., Hersbach, H., Hólm, E. V., Isaksen, I., Kållberg, P., Köhler, M., Matricardi, M., McNally, A. P., Monge-Sanz, B. M., Morcrette, J.-J., Park, B.-K., Peubey, C., Rosnay, P. de, Tavolato, C., Thépaut, J.-N. and Vitart, F.: The ERA-Interim reanalysis: configuration and performance of the data assimilation system, *Q. J. R. Meteorol. Soc.*, 137, 553–597, doi:10.1002/qj.828, 2011.
- Díaz-Zorita, M., Duarte, G. A. and Grove, J. H.: A review of no-till systems and soil management for sustainable crop production in the subhumid and semiarid Pampas of Argentina, *Soil Tillage Res.*, 65, 1–18, doi:10.1016/S0167-1987(01)00274-4, 2002.
- Elliott, J., Müller, C., Deryng, D., Chrysanthacopoulos, J., Boote, K. J., Büchner, M., Foster, I., Glotter, M., Heinke, J., Iizumi, T., Izaurrealde, R. C., Mueller, N. D., Ray, D. K., Rosenzweig, C., Ruane, A. C. and Sheffield, J.: The Global Gridded Crop Model Intercomparison: data and modeling protocols for Phase 1 (v1.0), *Geosci. Model Dev.*, 8, 261–277, doi:10.5194/gmd-8-261-2015, 2015.
- Enrique, G. S., Braud, I., Jean-Louis, T., Michel, V., Pierre, B. and Jean-Christophe, C.: Modelling heat and water exchanges of fallow land covered with plant-residue mulch, *Agric. For. Meteorol.*, 97, 151–169, doi:10.1016/S0168-1923(99)00081-7, 1999.
- Fader, M., Rost, S., Müller, C., Bondeau, A. and Gerten, D.: Virtual water content of temperate cereals and maize: Present and potential future patterns, *J. Hydrol.*, 384, 218–231, doi:10.1016/j.jhydrol.2009.12.011, 2010.



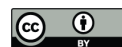

- 588 Grandy, A. S., Loecke, T. D., Parr, S. and Robertson, G. P.: Long-term trends in nitrous oxide emissions, soil  
589 nitrogen, and crop yields of till and no-till cropping systems, *J. Environ. Qual.*, 35, 1487–1495, 2006.
- 590 Green, T. R., Ahuja, L. R. and Benjamin, J. G.: Advances and challenges in predicting agricultural management  
591 effects on soil hydraulic properties, *Geoderma*, 116, 3–27, doi:10.1016/S0016-7061(03)00091-0, 2003.
- 592 Gregory, J. M.: Soil cover prediction with various amounts and types of crop residue, *Trans. ASAE*, 25, 1333–  
593 1337, doi:10.13031/2013.33723, 1982.
- 594 Harris, I., Jones, P. D., Osborn, T. J. and Lister, D. H.: Updated high-resolution grids of monthly climatic  
595 observations – the CRU TS3.10 Dataset, *Int. J. Climatol.*, 34, 623–642, doi:10.1002/joc.3711, 2014.
- 596 Hillel, D.: Chapter 12 Soil temperature and heat flow, in *Introduction to Environmental Soil Physics*, pp. 215–  
597 234, Elsevier Academic Press Inc, Amsterdam., 2004.
- 598 Jägermeyr, J., Gerten, D., Heinke, J., Schaphoff, S., Kumm, M. and Lucht, W.: Water savings potentials of  
599 irrigation systems: global simulation of processes and linkages, *Hydrol. Earth Syst. Sci.*, 19, 3073, 2015.
- 600 Jarvis, P. G. and McNaughton, K. G.: Stomatal control of transpiration: scaling up from leaf to region, *Adv.  
601 Ecol. Res.*, 15, 1–49, doi:10.1016/S0065-2504(08)60119-1, 1986.
- 602 van Kessel, C., Venterea, R., Six, J., Adviento-Borbe, M. A., Linquist, B. and Van Groenigen, K. J.: Climate,  
603 duration, and N placement determine N<sub>2</sub>O emissions in reduced tillage systems: a meta-analysis, *Glob. Change  
604 Biol.*, 19, 33–44, 2013.
- 605 Klein Goldewijk, K., Beusen, A., Van Dreht, G. and De Vos, M.: The HYDE 3.1 spatially explicit database of  
606 human-induced global land-use change over the past 12,000 years: HYDE 3.1 Holocene land use, *Glob. Ecol.  
607 Biogeogr.*, 20, 73–86, doi:10.1111/j.1466-8238.2010.00587.x, 2010.
- 608 Lamarque, J.-F., Dentener, F., McConnell, J., Ro, C.-U., Shaw, M., Vet, R., Bergmann, D., Cameron-Smith, P.,  
609 Dalsoren, S., Doherty, R., Faluvegi, G., Ghan, S. J., Josse, B., Lee, Y. H., MacKenzie, I. A., Plummer, D.,  
610 Shindell, D. T., Skeie, R. B., Stevenson, D. S., Strode, S., Zeng, G., Curran, M., Dahl-Jensen, D., Das, S.,  
611 Fritzsche, D. and Nolan, M.: Multi-model mean nitrogen and sulfur deposition from the Atmospheric Chemistry  
612 and Climate Model Intercomparison Project (ACCMIP): evaluation of historical and projected future changes,  
613 *Atmospheric Chem. Phys.*, 13, 7997–8018, doi:https://doi.org/10.5194/acp-13-7997-2013, 2013.
- 614 Linn, D. M. and Doran, J. W.: Effect of water-filled pore space on carbon dioxide and nitrous oxide production  
615 in tilled and nontilled soils 1, *Soil Sci. Soc. Am. J.*, 48, 1267–1272, 1984.
- 616 Lugato, E., Leip, A. and Jones, A.: Mitigation Potential of Soil Carbon Management Overestimated by  
617 Neglecting N<sub>2</sub>O Emissions, *Nat. Clim. Change*, 8, 219, 2018.
- 618 Lutz, F., Stoorvogel, J. and Müller, C.: Options to model the effects of tillage on N<sub>2</sub>O emissions at the global  
619 scale, *Ecological Modelling*, under review.
- 620 Maharjan, G. R., Prescher, A.-K., Nendel, C., Ewert, F., Mboh, C. M., Gaiser, T. and Seidel, S. J.: Approaches to  
621 model the impact of tillage implements on soil physical and nutrient properties in different agro-ecosystem  
622 models, *Soil Tillage Res.*, 180, 210–221, 2018.
- 623 Mangalassery, S., Sjoegersten, S., Sparkes, D. L. and Mooney, S. J.: Examining the potential for climate change  
624 mitigation from zero tillage, *J. Agric. Sci.*, 153, 1151–1173, doi:10.1017/S0021859614001002, 2015.
- 625 Martins, I. C. F., Cividanes, F. J., Barbosa, J. C., Araújo, E. de S. and Haddad, G. Q.: Faunal analysis and  
626 population fluctuation of Carabidae and Staphylinidae (Coleoptera) in no-tillage and conventional tillage  
627 systems, *Rev. Bras. Entomol.*, 53, 432–443, 2009.
- 628 Mei, K., Wang, Z., Huang, H., Zhang, C., Shang, X., Dahlgren, R. A., Zhang, M. and Xia, F.: Stimulation of N<sub>2</sub>  
629 O emission by conservation tillage management in agricultural lands: A meta-analysis, *Soil Tillage Res.*, 182,  
630 86–93, doi:10.1016/j.still.2018.05.006, 2018.



- 631 Minasny, B. and McBratney, A. B.: Limited effect of organic matter on soil available water capacity, *Eur. J. Soil*  
632 *Sci.*, 69, 39–47, 2018.
- 633 Nachtergaele, F., Van Velthuizen, H., Verelst, L., Batjes, N., Dijkshoorn, K., van Engelen, V., Fischer, G.,  
634 Jones, A., Montanarella, L. and Petri, M.: Harmonized World Soil Database (version 1.1). Food and Agriculture  
635 Organization of the United Nations. Rome, Italy and IIASA, Laxenburg, Austria., [online] Available from:  
636 <http://www.fao.org/soils-portal/soil-survey/soil-maps-and-databases/harmonized-world-soil-database-v12/en/>  
637 (Accessed 12 July 2018), 2009.
- 638 Ogle, S. M., Breidt, F. J. and Paustian, K.: Agricultural management impacts on soil organic carbon storage  
639 under moist and dry climatic conditions of temperate and tropical regions, *Biogeochemistry*, 72, 87–121,  
640 doi:10.1007/s10533-004-0360-2, 2005.
- 641 Onstad, C. A., Wolfe, M. L., Larson, C. L. and Slack, D. C.: Tilled soil subsidence during repeated wetting.,  
642 *Trans. - Am. Soc. Agric. Eng.*, 27, 733–736, doi:10.13031/1013.32862, 1984.
- 643 Pachepsky, Y. A. and van Genuchten, M. T.: Pedotransfer Functions, in *Encyclopedia of Agrophysics*, edited by  
644 J. Gliński, J. Horabik, and J. Lipiec, pp. 556–561, Springer Netherlands, Dordrecht. [online] Available from:  
645 [http://link.springer.com/10.1007/978-90-481-3585-1\\_109](http://link.springer.com/10.1007/978-90-481-3585-1_109) (Accessed 23 January 2017), 2011.
- 646 Podder, M., Akter, M., Saifullah, A. and Roy, S.: Impacts of Plough Pan on Physical and Chemical Properties of  
647 Soil, *J. Environ. Sci. Nat. Resour.*, 5, doi:10.3329/jesnr.v5i1.11594, 2012.
- 648 Portmann, F. T., Siebert, S. and Döll, P.: MIRCA2000—Global monthly irrigated and rainfed crop areas around  
649 the year 2000: A new high-resolution data set for agricultural and hydrological modeling, *Glob. Biogeochem.*  
650 *Cycles*, 24, GB1011, doi:10.1029/2008GB003435, 2010.
- 651 Powlson, D. S., Stirling, C. M., Jat, M. L., Gerard, B. G., Palm, C. A., Sanchez, P. A. and Cassman, K. G.:  
652 Limited potential of no-till agriculture for climate change mitigation, *Nat. Clim. Change*, 4, 678, 2014.
- 653 Pribyl, D. W.: A critical review of the conventional SOC to SOM conversion factor, *Geoderma*, 156, 75–83,  
654 doi:10.1016/j.geoderma.2010.02.003, 2010.
- 655 Priestley, C. H. B. and Taylor, R. J.: On the assessment of surface heat flux and evaporation using large-scale  
656 parameters, *Mon. Weather Rev.*, 100, 81–92, 1972.
- 657 Ranaivoson, L., Naudin, K., Ripoche, A., Affholder, F., Rabeharisoa, L. and Corbeels, M.: Agro-ecological  
658 functions of crop residues under conservation agriculture. A review, *Agron. Sustain. Dev.*, 37, 1–17,  
659 doi:10.1007/s13593-017-0432-z, 2017.
- 660 Rawls, W. J., Brakensiek, D. L. and Saxton, K. E.: Estimation of Soil Water Properties, *Trans.-Am. Soc. Agric.*  
661 *Eng.*, 25, 1316–1320, 1982.
- 662 Saxton, K. E. and Rawls, W. J.: Soil Water Characteristic Estimates by Texture and Organic Matter for  
663 Hydrologic Solutions, *Soil Sci. Soc. Am. J.*, 70, 1569–1577, doi:10.2136/sssaj2005.0117, 2006.
- 664 Saxton, K. E., Rawls, W. J., Romberger, J. S. and Papendick, R. I.: Estimating Generalized Soil-water  
665 Characteristics from Texture, *Soil Sci. Soc. Am. J.*, 50, 1031–1036,  
666 doi:10.2136/sssaj1986.03615995005000040039x, 1986.
- 667 Schaphoff, S., Heyder, U., Ostberg, S., Gerten, D., Heinke, J. and Lucht, W.: Contribution of permafrost soils to  
668 the global carbon budget, *Environ. Res. Lett.*, 8, 014026, doi:10.1088/1748-9326/8/1/014026, 2013.
- 669 Schaphoff, S., Forkel, M., Müller, C., Knauer, J., Bloh, W. von, Gerten, D., Jägermeyr, J., Lucht, W., Rammig,  
670 A., Thonicke, K. and Waha, K.: LPJmL4 – a dynamic global vegetation model with managed land – Part 2:  
671 Model evaluation, *Geosci. Model Dev.*, 11, 1377–1403, doi:https://doi.org/10.5194/gmd-11-1377-2018, 2018a.
- 672 Schaphoff, S., von Bloh, W., Rammig, A., Thonicke, K., Biemans, H., Forkel, M., Gerten, D., Heinke, J.,  
673 Jägermeyr, J., Knauer, J., Langerwisch, F., Lucht, W., Müller, C., Rolinski, S. and Waha, K.: LPJmL4 – a  
674 dynamic global vegetation model with managed land – Part 1: Model description, *Geosci Model Dev*, 11, 1343–  
675 1375, doi:10.5194/gmd-11-1343-2018, 2018b.

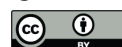

- 676 Schlüter, S., Grosse, S., Diel, J., Wu, G.-M., Tischer, S., Deubel, A. and Rücknagel, J.: Long-term effects  
677 of conventional and reduced tillage on soil structure, soil ecological and soil hydraulic properties, *Geoderma*,  
678 332, 10–19, 2018.
- 679 Sitch, S., Smith, B., Prentice, I. C., Arneeth, A., Bondeau, A., Cramer, W., Kaplan, J. O., Levis, S., Lucht, W.,  
680 Sykes, M. T. and others: Evaluation of ecosystem dynamics, plant geography and terrestrial carbon cycling in  
681 the LPJ dynamic global vegetation model, *Glob. Change Biol.*, 9, 161–185, doi:10.1046/j.1365-  
682 2486.2003.00569.x, 2003.
- 683 Six, J., Ogle, S. M., Jay breidt, F., Conant, R. T., Mosier, A. R. and Paustian, K.: The potential to mitigate global  
684 warming with no-tillage management is only realized when practised in the long term, *Glob. Change Biol.*, 10,  
685 155–160, doi:10.1111/j.1529-8817.2003.00730.x, 2004.
- 686 Smith, P., Martino, D., Cai, Z., Gwary, D., Janzen, H., Kumar, P., McCarl, B., Ogle, S., O'Mara, F., Rice, C.,  
687 Scholes, B., Sirotenko, O., Howden, M., McAllister, T., Pan, G., Romanenkov, V., Schneider, U., Towprayoon,  
688 S., Wattenbach, M. and Smith, J.: Greenhouse gas mitigation in agriculture, *Philos. Trans. R. Soc. B Biol. Sci.*,  
689 363, 789–813, doi:10.1098/rstb.2007.2184, 2008.
- 690 Snyder, C. S., Bruulsema, T. W., Jensen, T. L. and Fixen, P. E.: Review of greenhouse gas emissions from crop  
691 production systems and fertilizer management effects, *Agric. Ecosyst. Environ.*, 133, 247–266,  
692 doi:10.1016/j.agee.2009.04.021, 2009.
- 693 Steinbach, H. S. and Alvarez, R.: Changes in soil organic carbon contents and nitrous oxide emissions after  
694 introduction of no-till in Pampean agroecosystems, *J. Environ. Qual.*, 35, 3–13, 2006.
- 695 Steiner, J. L.: Tillage and Surface Residue Effects on Evaporation from Soils, *Soil Sci. Soc. Am. J.*, 53, 911–  
696 916, 1989.
- 697 Strudley, M. W., Green, T. R. and Ascough, J. C.: Tillage effects on soil hydraulic properties in space and time:  
698 State of the science, *Soil Tillage Res.*, 99, 4–48, doi:10.1016/j.still.2008.01.007, 2008.
- 699 Tans, P. and Keeling, R.: Trends in Atmospheric Carbon Dioxide, National Oceanic & Atmospheric  
700 Administration, Earth System Research Laboratory (NOAA/ESRL), available at:  
701 <https://www.esrl.noaa.gov/gmd/ccgg/trends/>, [online] Available from:  
702 <https://www.esrl.noaa.gov/gmd/ccgg/trends/> (Accessed 12 July 2018), 2015.
- 703 Van Looy, K., Bouma, J., Herbst, M., Koestel, J., Minasny, B., Mishra, U., Montzka, C., Nemes, A., Pachepsky,  
704 Y. A., Padarian, J., Schaap, M. G., Tóth, B., Verhoef, A., Vanderborght, J., van der Ploeg, M. J., Weiermüller,  
705 L., Zacharias, S., Zhang, Y. and Vereecken, H.: Pedotransfer Functions in Earth System Science: Challenges and  
706 Perspectives: PTFs in Earth system science perspective, *Rev. Geophys.*, 55, 1199–1256,  
707 doi:10.1002/2017RG000581, 2017.
- 708 White, J. W., Jones, J. W., Porter, C., McMaster, G. S. and Sommer, R.: Issues of spatial and temporal scale in  
709 modeling the effects of field operations on soil properties, *Oper. Res.*, 10, 279–299, doi:10.1007/s12351-009-  
710 0067-1, 2010.
- 711 Willekens, K., Vandecasteele, B., Buchan, D. and De Neve, S.: Soil quality is positively affected by reduced  
712 tillage and compost in an intensive vegetable cropping system, *Appl. Soil Ecol.*, 82, 61–71,  
713 doi:10.1016/j.apsoil.2014.05.009, 2014.
- 714 Williams, J. R., Izaurralde, R. C., Williams, C. and Steglich, E. M.: *Agricultural Policy / Environmental*  
715 *eXtender Model. Theoretical Documentation. Version 0806. AgriLIFE Research. Texas A&M System.*, 2015.
- 716 Wösten, J. H. M., Lilly, A., Nemes, A. and Le Bas, C.: Development and use of a database of hydraulic  
717 properties of European soils, *Geoderma*, 90, 169–185, doi:10.1016/S0016-7061(98)00132-3, 1999.
- 718 Zhao, X., Liu, S.-L., Pu, C., Zhang, X.-Q., Xue, J.-F., Zhang, R., Wang, Y.-Q., Lal, R., Zhang, H.-L. and Chen,  
719 F.: Methane and nitrous oxide emissions under no-till farming in China: a meta-analysis, *Glob. Change Biol.*, 22,  
720 1372–1384, 2016.

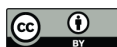

Table 1: Corresponding coefficients for the function  $\lambda_{pwp}$ ,  $\lambda_{lc}$  and  $\lambda_{sat}$ .

|                 | $\alpha$ | $\beta$ | $\gamma$ | $\delta$ | $\varepsilon$ | $\rho$ | $\sigma$ |
|-----------------|----------|---------|----------|----------|---------------|--------|----------|
| $\lambda_{pwp}$ | -0.024   | 0.0487  | 0.006    | 0.005    | -0.013        | 0.068  | 0.031    |
| $\lambda_{lc}$  | -0.251   | 0.195   | 0.011    | 0.006    | -0.027        | 0.452  | 0.299    |
| $\lambda_{sat}$ | 0.278    | 0.034   | 0.022    | -0.018   | -0.027        | -0.584 | 0.078    |

Table 2: LPJmL simulation settings for the evaluation.

| Scenario                 | Simulation abbreviation | Retained residue fraction on field | Tillage efficiency ( $TL_{frac}$ ) | Mixing efficiency of tillage (mE) |
|--------------------------|-------------------------|------------------------------------|------------------------------------|-----------------------------------|
| Tillage + residues       | T-R                     | 1.0                                | 0.95                               | 0.90                              |
| Tillage + no residues    | T-NR                    | 0.1                                | 0.95                               | 0.90                              |
| No tillage + residues    | NT-R                    | 1.0                                | 0                                  | 0                                 |
| No tillage + no residues | NT-NR                   | 0.1                                | 0                                  | 0                                 |

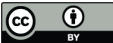

Table 3: Percentage values for each soil textural class of silt, sand and clay content used in LPIml and correspondent hydraulic parameters before and after tillage with 0% and 5% SOM using the Saxton and Rawls (2006) pedotransfer function.

| Soil class | Silt (%) Sand (%) Clay (%) |    |    | pre tillage |      |      |        |      |      | after tillage |        |      |        |      |        |
|------------|----------------------------|----|----|-------------|------|------|--------|------|------|---------------|--------|------|--------|------|--------|
|            |                            |    |    | 0% SOM      |      |      | 5% SOM |      |      | 0% SOM        |        |      | 5% SOM |      |        |
|            |                            |    |    | WHC         | SAT  | FC   | Ks     | WHC  | SAT  | FC            | Ks     | WHC  | SAT    | FC   | Ks     |
| Sand       | 5                          | 92 | 3  | 0.30        | 0.68 | 0.31 | 244.11 | 0.38 | 0.85 | 0.45          | 202.26 | 0.32 | 0.78   | 0.33 | 365.15 |
| Loamy sand | 12                         | 82 | 6  | 0.31        | 0.66 | 0.34 | 124.47 | 0.39 | 0.83 | 0.47          | 142.43 | 0.33 | 0.76   | 0.36 | 219.26 |
| Sandy loam | 32                         | 58 | 10 | 0.31        | 0.59 | 0.37 | 43.16  | 0.38 | 0.77 | 0.48          | 80.17  | 0.34 | 0.72   | 0.40 | 110.34 |
| Loam       | 39                         | 43 | 18 | 0.31        | 0.57 | 0.42 | 13.54  | 0.36 | 0.73 | 0.50          | 38.35  | 0.34 | 0.70   | 0.45 | 53.18  |
| Silty loam | 70                         | 17 | 13 | 0.29        | 0.48 | 0.37 | 6.12   | 0.33 | 0.68 | 0.45          | 42.91  | 0.32 | 0.64   | 0.40 | 45.16  |
| Sandy clay | 15                         | 58 | 27 | 0.35        | 0.65 | 0.52 | 9.00   | 0.40 | 0.76 | 0.59          | 16.31  | 0.37 | 0.76   | 0.54 | 33.07  |
| loam       | 34                         | 32 | 34 | 0.31        | 0.61 | 0.51 | 2.76   | 0.33 | 0.70 | 0.55          | 10.38  | 0.33 | 0.72   | 0.54 | 19.51  |
| Silty clay | 56                         | 10 | 34 | 0.25        | 0.54 | 0.46 | 2.05   | 0.26 | 0.66 | 0.48          | 15.13  | 0.28 | 0.68   | 0.48 | 20.84  |
| loam       | 6                          | 52 | 42 | 0.39        | 0.70 | 0.64 | 1.00   | 0.40 | 0.74 | 0.67          | 1.51   | 0.40 | 0.79   | 0.65 | 8.02   |
| Sandy clay | 47                         | 6  | 47 | 0.44        | 0.75 | 0.72 | 0.19   | 0.44 | 0.76 | 0.74          | 0.06   | 0.46 | 0.83   | 0.73 | 2.95   |
| Silty clay | 20                         | 22 | 58 | 0.29        | 0.68 | 0.63 | 0.45   | 0.26 | 0.67 | 0.60          | 1.07   | 0.31 | 0.78   | 0.65 | 5.79   |
| Clay       | 0                          | 99 | 1  | 0.00        | 0.01 | 0.01 | 0.10   | 0.00 | 0.01 | 0.01          | 0.10   | 0.00 | 0.01   | 0.01 | 0.10   |
| Rock       |                            |    |    |             |      |      |        |      |      |               |        |      |        |      |        |



Table 4: Comparison of simulated model output and literature values from meta-analysis.

| Variable/Scenario                        | Soil depth (m) | # treatments | paired | Literature mean in % (95% confidence interval) | Time (years) | horizon | Model (median in %) | Model (5% and 95% percentile) | Reference               |
|------------------------------------------|----------------|--------------|--------|------------------------------------------------|--------------|---------|---------------------|-------------------------------|-------------------------|
| <b>notill residue - till residue</b>     |                |              |        |                                                |              |         |                     |                               |                         |
| SOM (0.3m)                               | 0-0.3          |              | 101    | +5.0 (-1.0, 9.2) <sup>††</sup>                 | **           |         | +5.7                | +1.7, +14.0                   | Abdalla et al., 2016    |
| CO <sub>2</sub>                          |                |              | 113    | -23.0 (-35.0, -13.8) <sup>*</sup>              | **           |         | +2.3                | -9.6, +29.0                   | Abdalla et al., 2016    |
| N <sub>2</sub> O                         |                |              | 100    | +36.1 (+25.0, +47.8) <sup>*</sup>              | **           |         | +7.5                | -6.7, +68.9                   | Mei et al., 2018        |
| N <sub>2</sub> O (tropical)              |                |              | 123    | +74.1 (+34.8, +119.9) <sup>††</sup>            | **           |         | +2.9                | -8.5, +43.3                   | Mei et al., 2018        |
| N <sub>2</sub> O (warm temperate)        |                |              | 62     | +17.0 (+6.5, +29.9) <sup>††</sup>              | **           |         | +11.3               | +0.7, +75.7                   | Mei et al., 2018        |
| N <sub>2</sub> O (cool temperate)        |                |              | 27     | -1.7 (-10.5, +8.4) <sup>††</sup>               | **           |         | +8.8                | -3.1, +170.5                  | Mei et al., 2018        |
| N <sub>2</sub> O (arid)                  |                |              | 56     | +35 (+7.5, +69.0) <sup>*</sup>                 | **           |         | +8.2                | -6.8, +69.9                   | Kessel et al., 2013     |
| N <sub>2</sub> O (humid)                 |                |              | 183    | -1.5 (-11.6, +11.1) <sup>*</sup>               | **           |         | +5.9                | -6.5, +65.6                   | Kessel et al., 2013     |
| Yield (wheat) B                          |                |              | 47     | -2.6 (-8.2, +3.8) <sup>*</sup>                 | 10§          |         | +4.3                | -9.4, +58.7                   | Pittelkow et al., 2015b |
| Yield (maize) B                          |                |              | 64     | -7.6 (-10.1, -4.3) <sup>*</sup>                | 10§          |         | +3.4                | -23.1, +62.9                  | Pittelkow et al., 2015b |
| Yield (pulses) B                         |                |              | 12     | -2.4 (-9.0, +4.9) <sup>*</sup>                 | 10§          |         | +10.2               | 0.0, +215.7                   | Pittelkow et al., 2015b |
| Yield (rapeseed) B                       |                |              | 10     | +0.7 (-2.8, +4.1) <sup>*</sup>                 | 10§          |         | +2.8                | -27.3, +50.6                  | Pittelkow et al., 2015b |
| <b>notill residue - notill noresidue</b> |                |              |        |                                                |              |         |                     |                               |                         |
| Evaporation                              |                |              | 3      | -16.5 <sup>B</sup> , -36.3 <sup>BB</sup>       | **           |         | -18.2               | -34.0, -2.1                   | Steiner 1989            |
| Evaporation                              |                |              | 3      | -30.7 <sup>D</sup> , -50.2 <sup>DD</sup>       | **           |         | -40.3               | -55.6, -9.0                   | Steiner 1989            |
| Evaporation                              |                |              | 3      | -44.9 <sup>E</sup> , -64.0 <sup>EE</sup>       | **           |         | -62.2               | -73.4, -34.4                  | Steiner 1989            |
| <b>till nores-no till-nores</b>          |                |              |        |                                                |              |         |                     |                               |                         |
| SOM (0.3m)                               | 0-0.3          |              | 46     | -12.0 (-15.3, -5.1) <sup>*</sup>               | **           |         | -15.1               | -41.2, -0.4                   | Abdalla et al.,         |

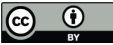

|                            |     |                       |     |       |              |                                 |
|----------------------------|-----|-----------------------|-----|-------|--------------|---------------------------------|
| CO2                        | 46  | +18.0 (+9.4, +27.3)*  | **  | +17.1 | +0.0, +114.4 | 2016<br>Abdalla et al.,<br>2016 |
| Yield (wheat) B            | 8   | +2.7 (-6.3, +12.7)*   | 10§ | -0.6  | -8.4, +20.9  | Pittelkow et al.,<br>2015b      |
| Yield (maize) B            | 12  | -25.4 (-14.7, -34.1)* | 10§ | -0.5  | -13.4, +5.7  | Pittelkow et al.,<br>2015b      |
| <b>till nores-till res</b> |     |                       |     |       |              |                                 |
| N2O                        | 105 | +1.3 (-5.4, +8.2)*‡   | **  | -8.4  | -19.5, +4.0  | Mei et al., 2018                |

\*estimated from graph

\*\*Time horizon of the study is unclear in the meta-analysis. The average over the first three years of model results is taken.

‡ includes conservation till

†† at least 30% on soil

‡ Residue management for conventional till unsure

§ Time horizon not explicitly mentioned by author

<sup>B</sup> 75g/m2 dry matter sorghum, <sup>BB</sup> 75g/m2 dry matter wheat

<sup>D</sup> 150g/m2 dry matter sorghum, <sup>DD</sup> 150g/m2 dry matter wheat

<sup>E</sup> 300g/m2 dry matter sorghum, <sup>EE</sup> 300g/m2 dry matter wheat

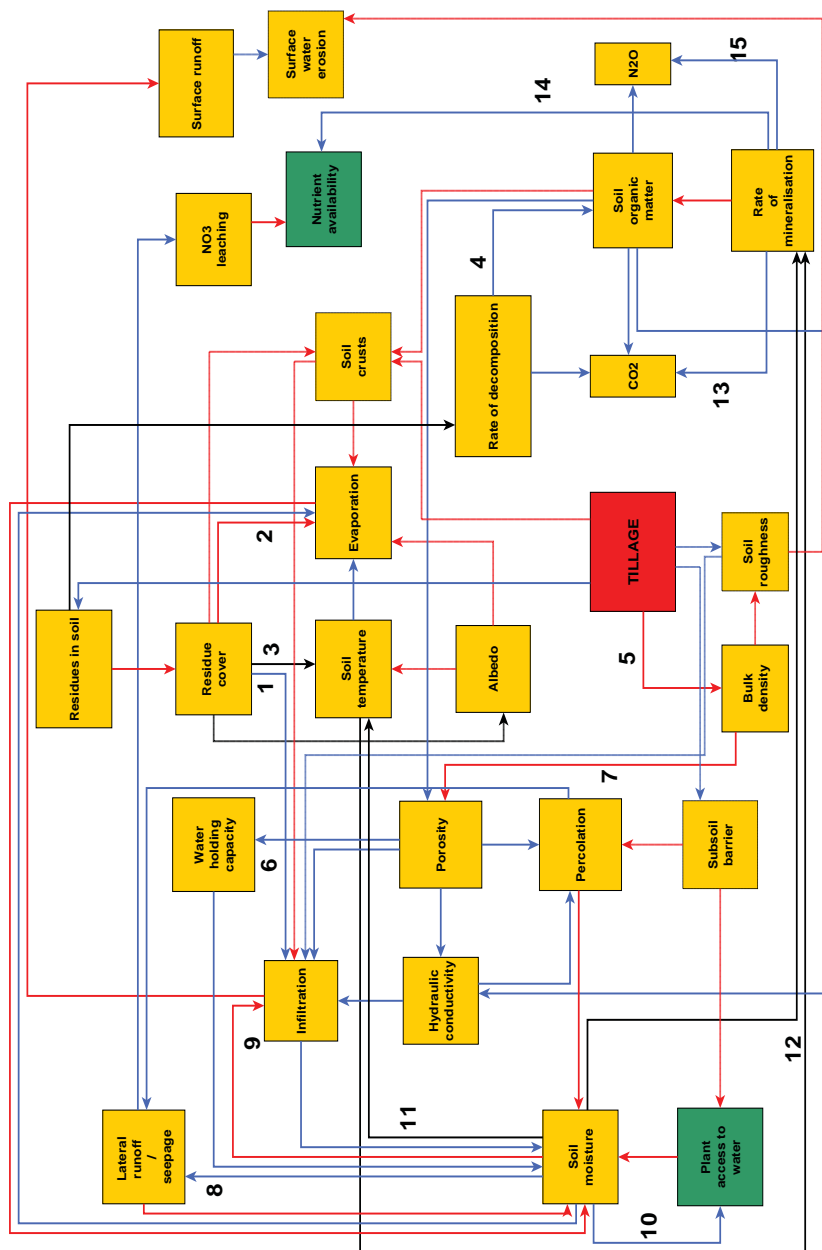

Fig. 1: Flow chart diagram of feedback processes caused by tillage, which are considered (dashed lines) and not considered (dashed lines) in LPJmL. Blue lines highlight positive feedbacks, red negative and black are ambiguous feedbacks.



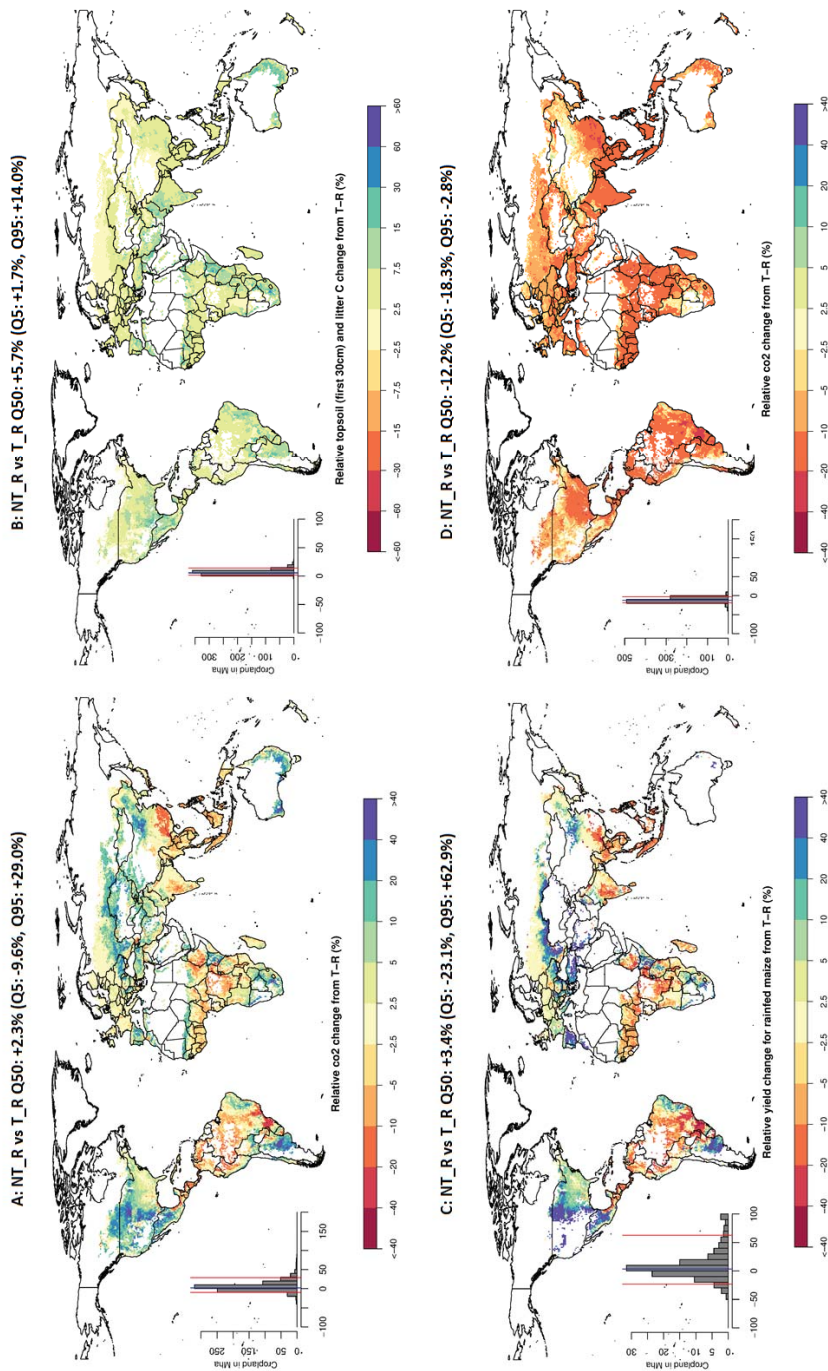

Fig. 2: Relative C dynamics comparing NT\_R vs. T\_R – Relative CO<sub>2</sub> change after ten years (A), relative topsoil and litter C change after ten years (B), relative yield change for rain-fed maize after ten years (C), relative CO<sub>2</sub> change after three years (D).

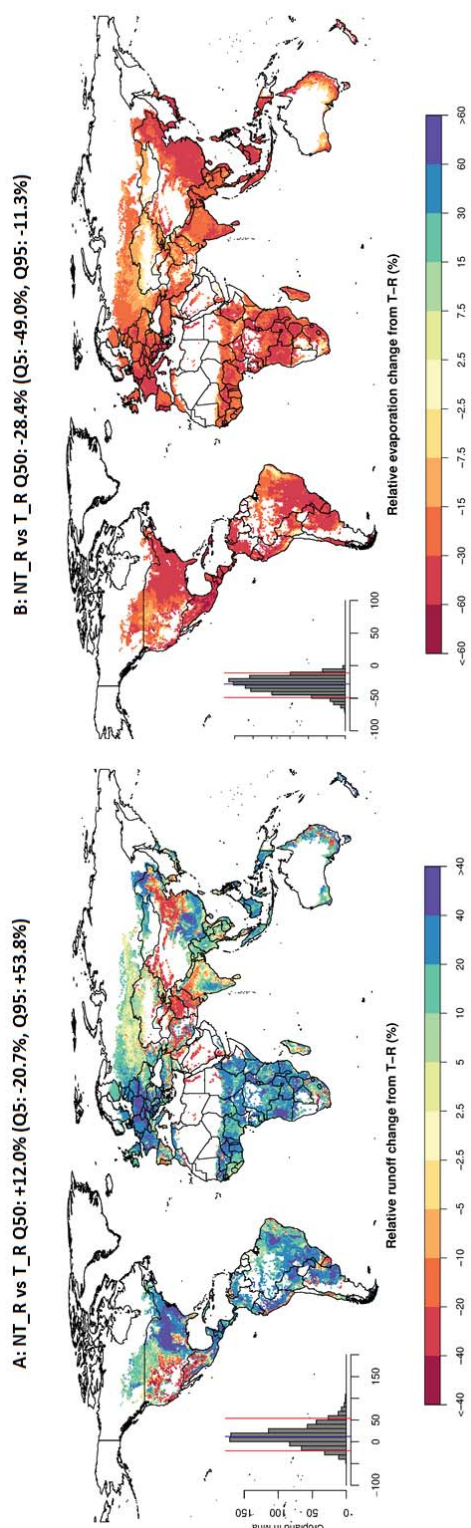

Fig. 3: Relative changes in runoff (A) and evaporation (B) comparing NT\_R vs. T\_R for the average of the first three years after implementation.

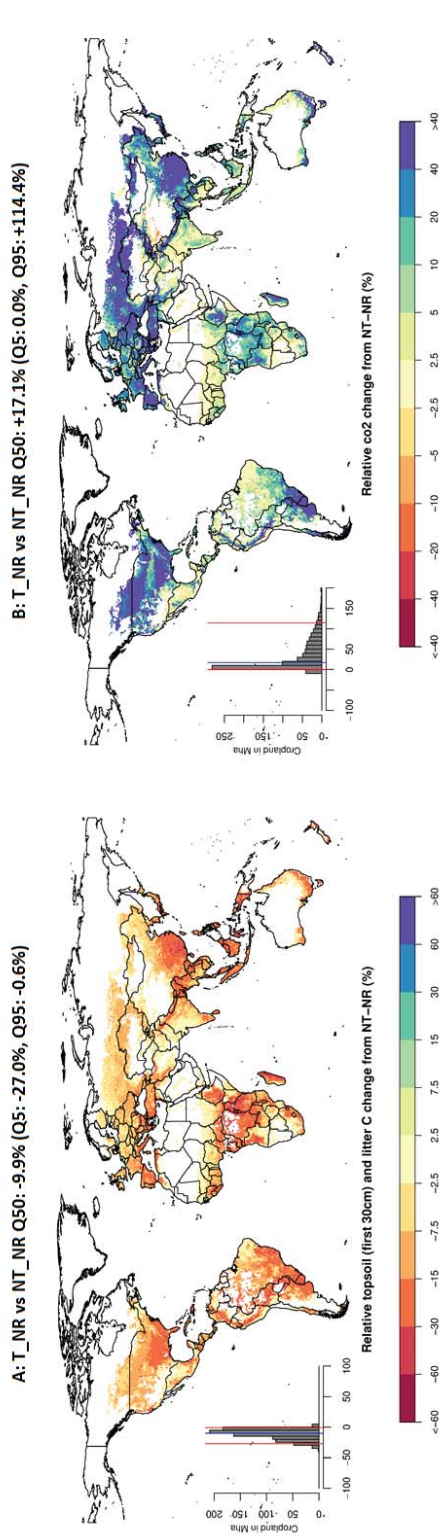

Appendix – Fig. 4: Relative topsoil and litter carbon change for T\_NR vs. NT\_NR after ten years of experiment duration (A), Relative CO<sub>2</sub> change for T\_NR vs. NT\_NR after ten years of experiment duration (B).

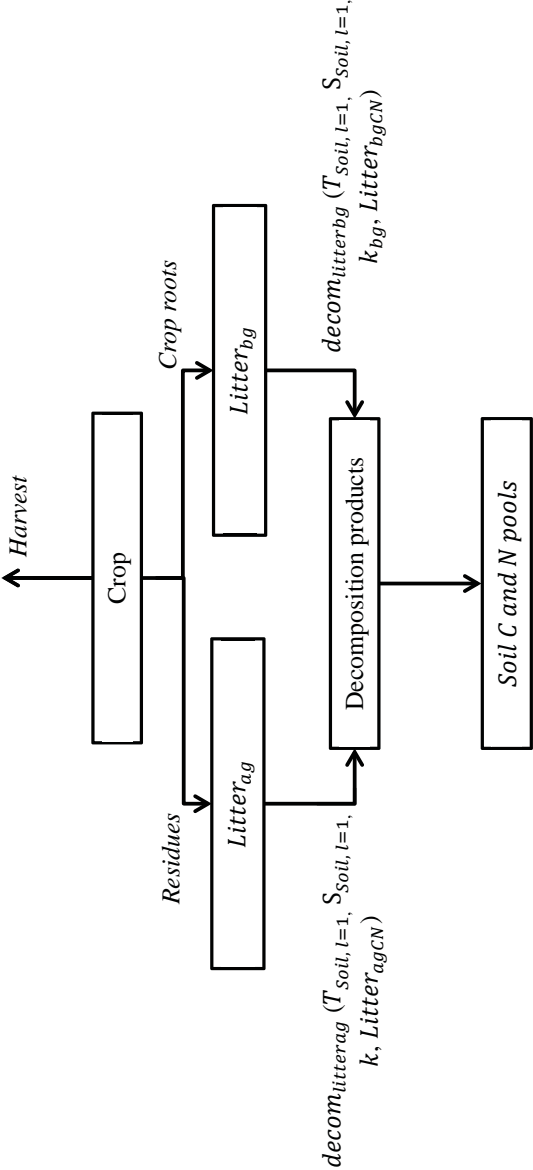

Appendix – Fig. 5(A): Overview of residue pools with corresponding decomposition variables.

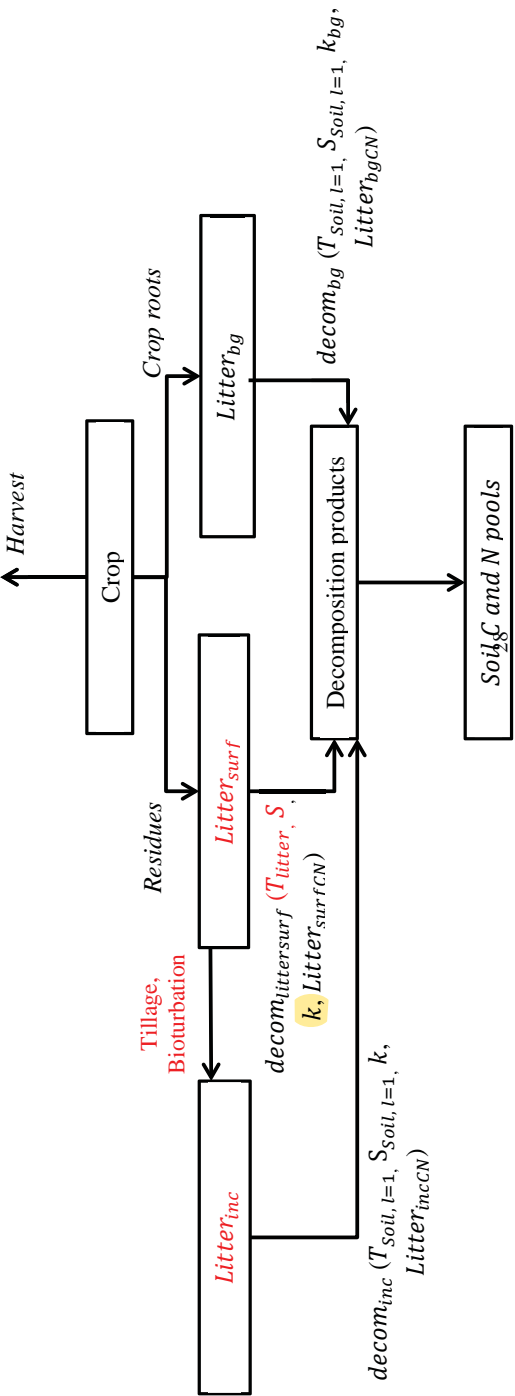

Appendix – Fig. 5(B): Overview of residue pools and the new pool for incorporated residues with corresponding decomposition variables.

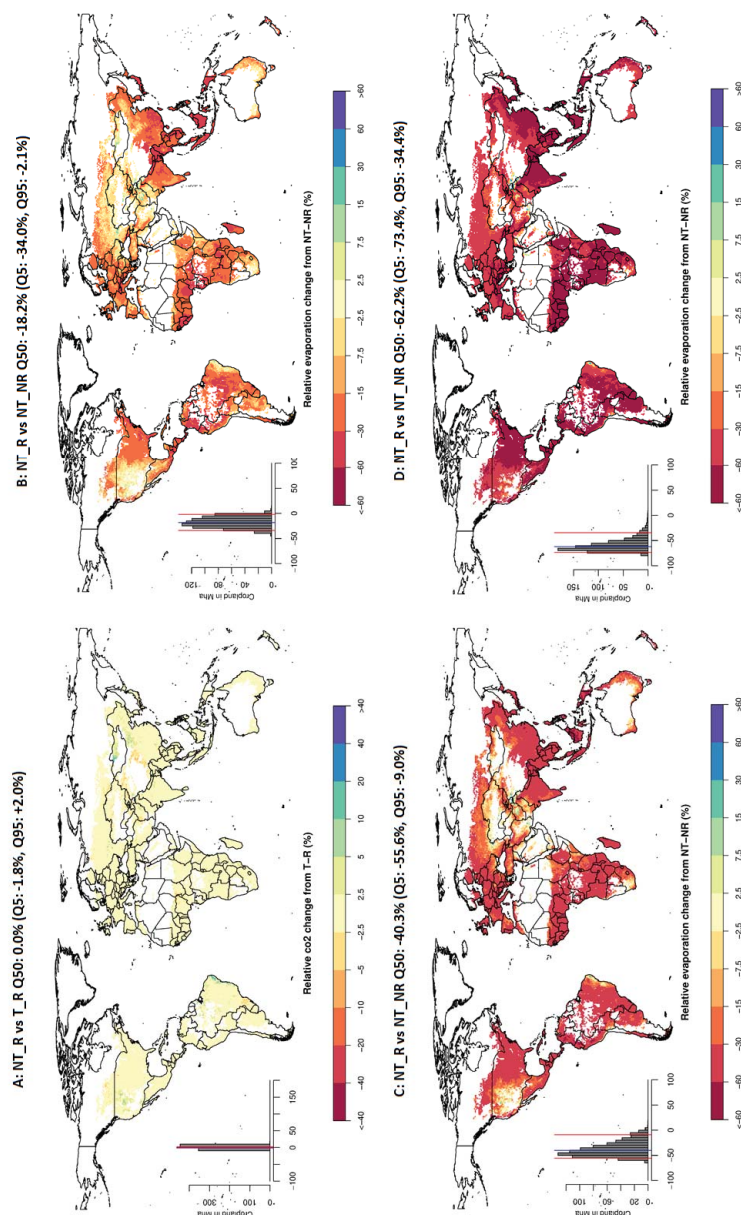

Appendix – Fig. 6: Relative CO<sub>2</sub> emission change for NT\_R vs. T\_R from bare soil experiment for the first three years with C m<sup>2</sup> yr<sup>-1</sup> fixed residue amount input (A), relative soil evaporation change for NT-R vs. NT-NR from the bare soil experiment for the first three years with 75g C m<sup>2</sup> yr<sup>-1</sup> fixed residue amount input (B), relative soil evaporation change for NT\_R vs. NT\_NR from bare soil experiment for the first three years with 150g C m<sup>2</sup> yr<sup>-1</sup> fixed residue amount input (C), Relative soil evaporation change for NT\_R vs. NT\_NR from bare soil experiment for the first three years with 300g C m<sup>2</sup> yr<sup>-1</sup> fixed residue amount input (D).



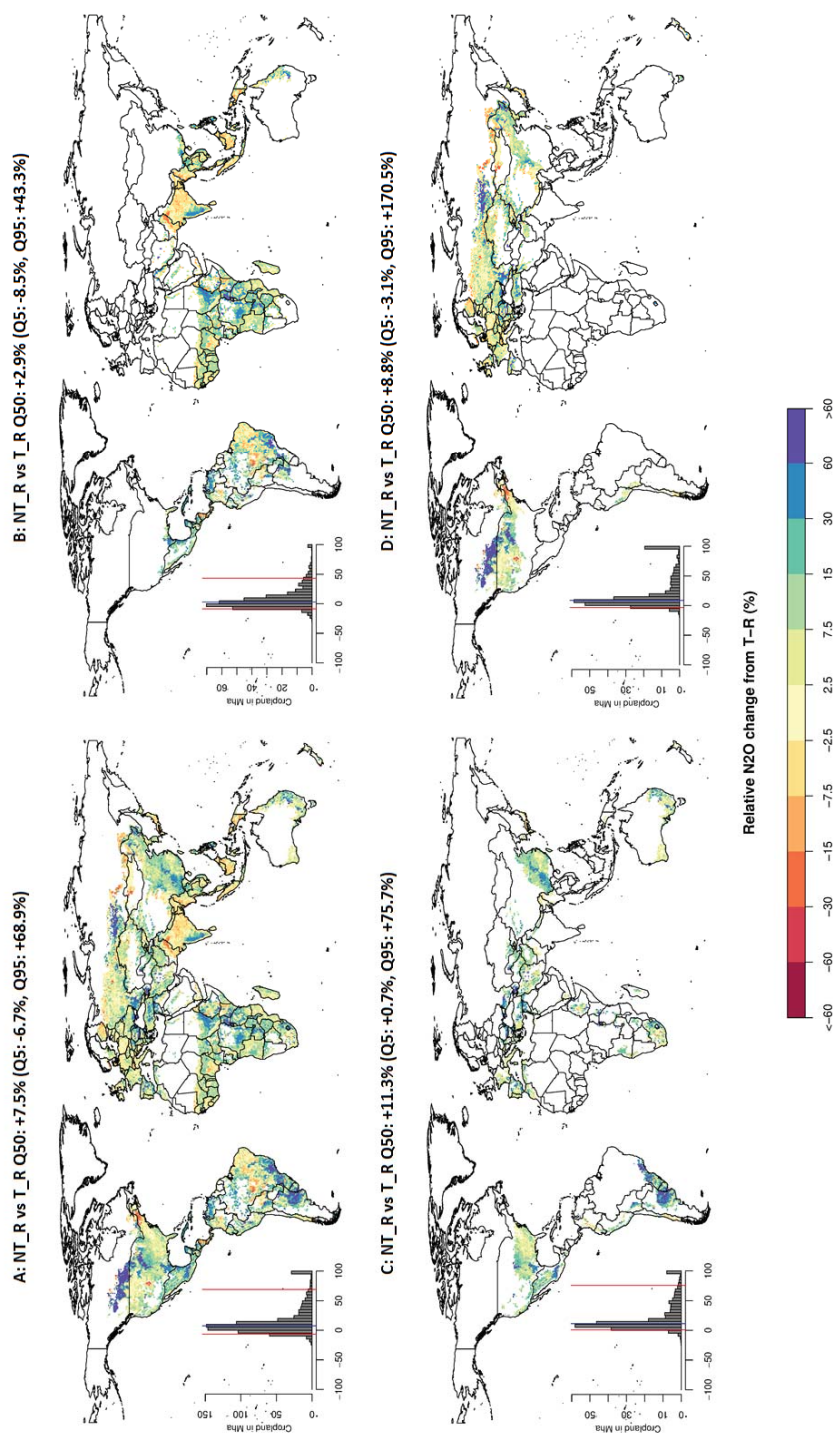

Appendix – Fig. 7: Relative changes in  $N_2O$  emissions compared to  $T_R$  (A), Relative changes in  $N_2O$  emissions compared to  $T_R$  in tropical regions (B), Relative changes in  $N_2O$  emissions compared to  $T_R$  in the warm temperate regions (C), Relative changes in  $N_2O$  emissions compared to  $T_R$  in the cold temperate regions (D).

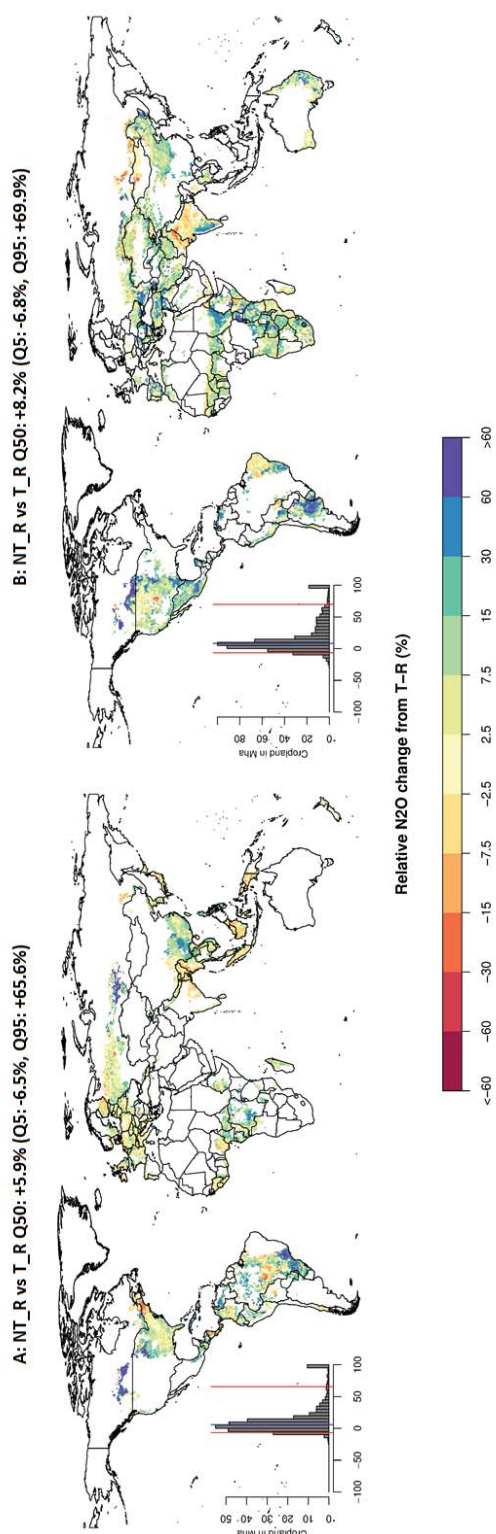

Appendix – Fig. 8: Relative changes in N<sub>2</sub>O emissions compared to T\_R in the humid regions (A), Relative changes in N<sub>2</sub>O emissions compared to T\_R in the arid regions (B).
